# Supplementary material for: Combination of Drug Delivery Properties of PAMAM Dendrimers and Cytotoxicity of Platinum(IV) Complexes—A More Selective Anticancer Treatment?
Source: MDPI journal article supplement (doi:10.3390/pharmaceutics15051515), 2023-05-17
Supplement: s1 [file s1]

# **Combination of Drug Delivery Properties of PAMAM Dendrimers and Cytotoxicity of Platinum(IV) Complexes—A More Selective Anticancer Treatment?**

**Yvonne Lerchbammer-Kreith <sup>1</sup>, Michaela Hejl <sup>1</sup>, Petra Vician <sup>2</sup>, Michael A. Jakupec <sup>1,3</sup>,  
Walter Berger <sup>2,3</sup>, Mathea S. Galanski <sup>1,\*</sup> and Bernhard K. Keppler <sup>1,3,\*</sup>**

<sup>1</sup> Institute of Inorganic Chemistry, Faculty of Chemistry, University of Vienna,  
Währinger Strasse 42, 1090 Vienna, Austria

<sup>2</sup> Center for Cancer Research and Comprehensive Cancer Center, Medical University of  
Vienna, Borschkegasse 8a, 1090 Vienna, Austria

<sup>3</sup> Research Cluster "Translational Cancer Therapy Research", University of Vienna,  
Währinger Strasse 42, 1090 Vienna, Austria

\* Correspondence: mathea.galanski@univie.ac.at (M.S.G.); bernhard.keppler@univie.ac.at  
(B.K.K.)

## Table of Contents

|                                                   |    |
|---------------------------------------------------|----|
| 1. NMR Spectra of Platinum(IV) Complexes 5-7..... | 3  |
| 2. NMR Spectra of Selected Conjugates .....       | 9  |
| 3. X-Ray Diffraction Analysis.....                | 15 |
| 4. Concentration-Effect Curves .....              | 19 |
| 5. In Vivo Data .....                             | 27 |
| 6. References .....                               | 28 |

# 1. NMR Spectra of Platinum(IV) Complexes 5-7

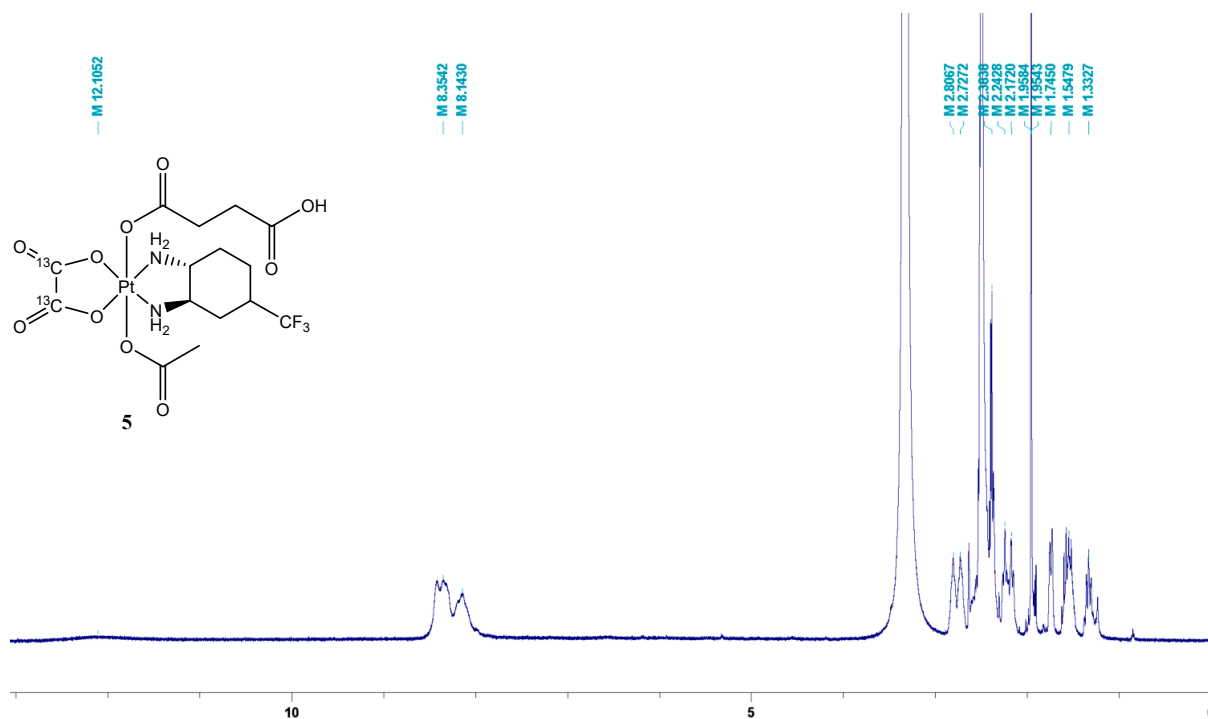

Figure S1. <sup>1</sup>H NMR spectrum of complex 5 in d<sub>6</sub>-DMSO.

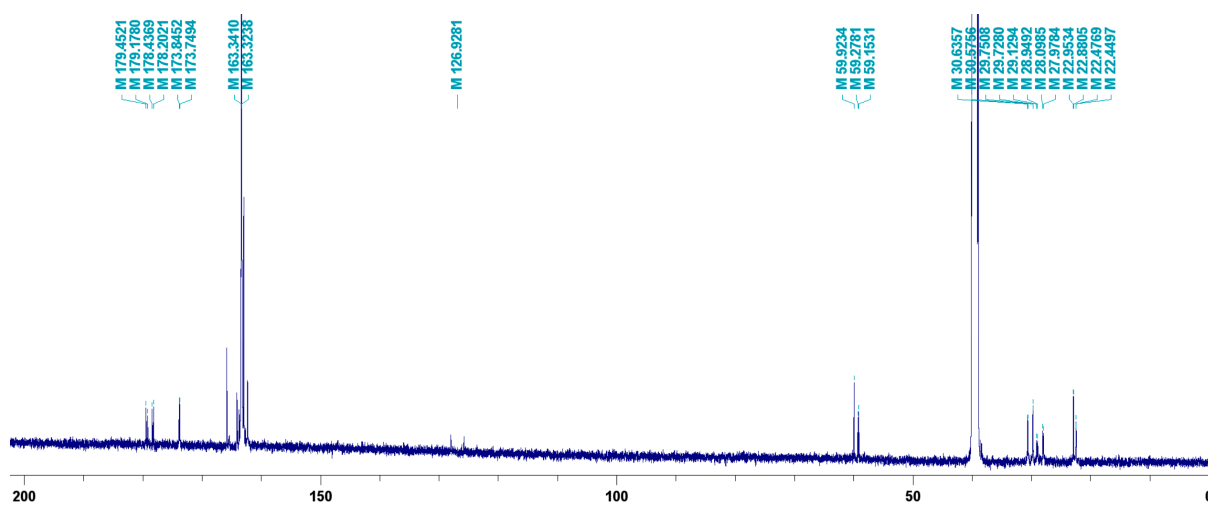

Figure S2. <sup>13</sup>C NMR spectrum of complex 5 in d<sub>6</sub>-DMSO.

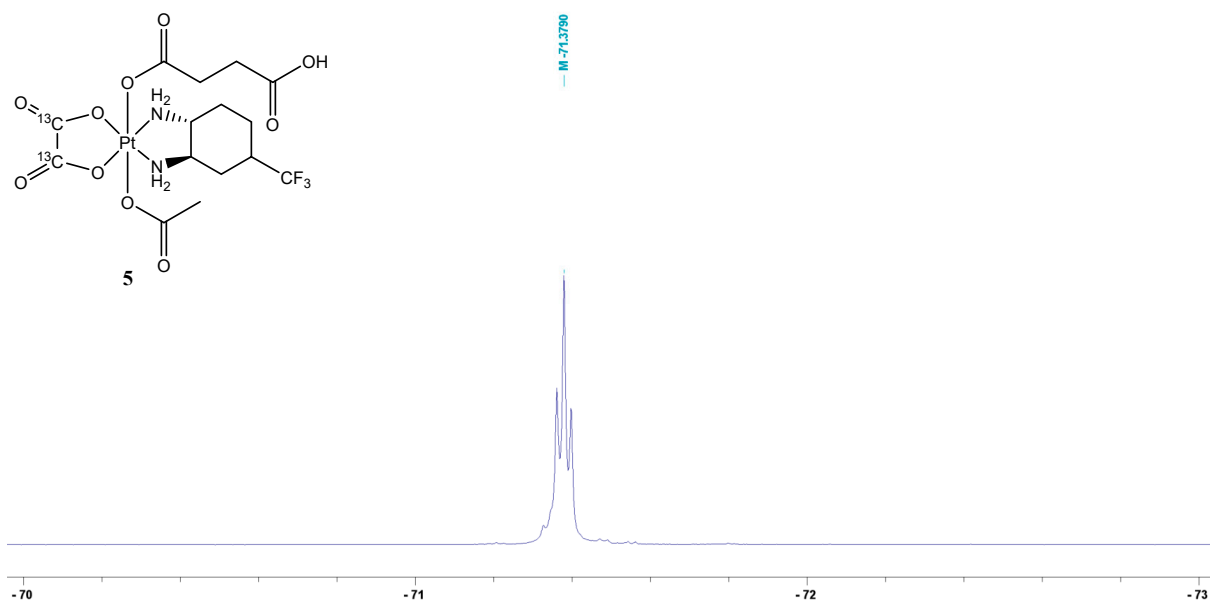

**Figure S3.**  $^{19}\text{F}$  NMR spectrum of complex **5** in  $\text{d}_6$ -DMSO.

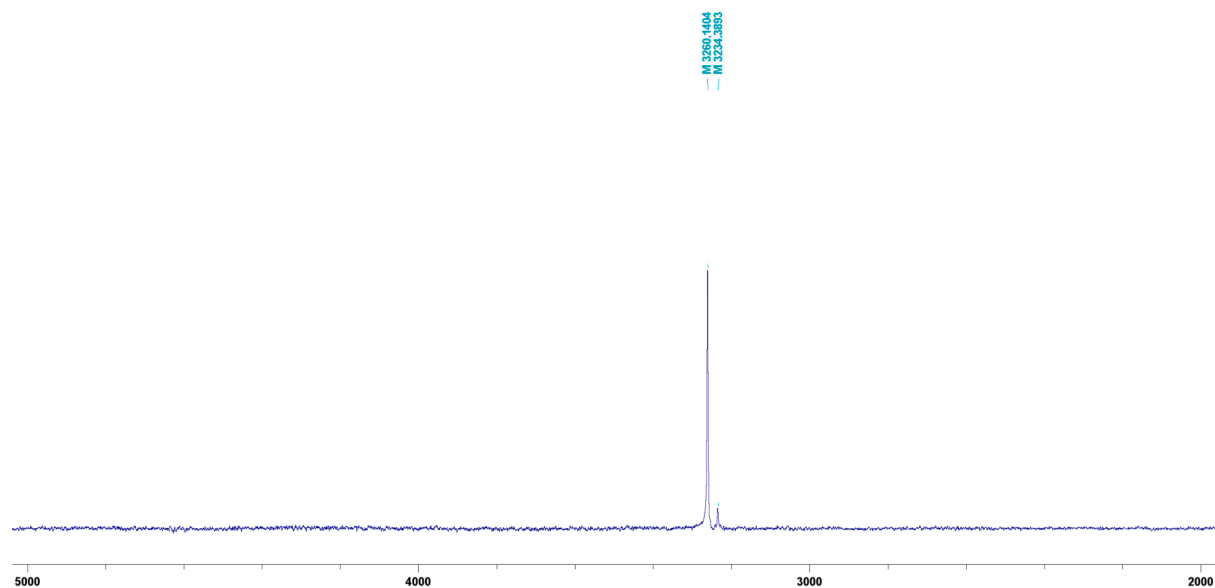

**Figure S4.**  $^{195}\text{Pt}$  NMR spectrum of complex **5** in  $\text{d}_6$ -DMSO.

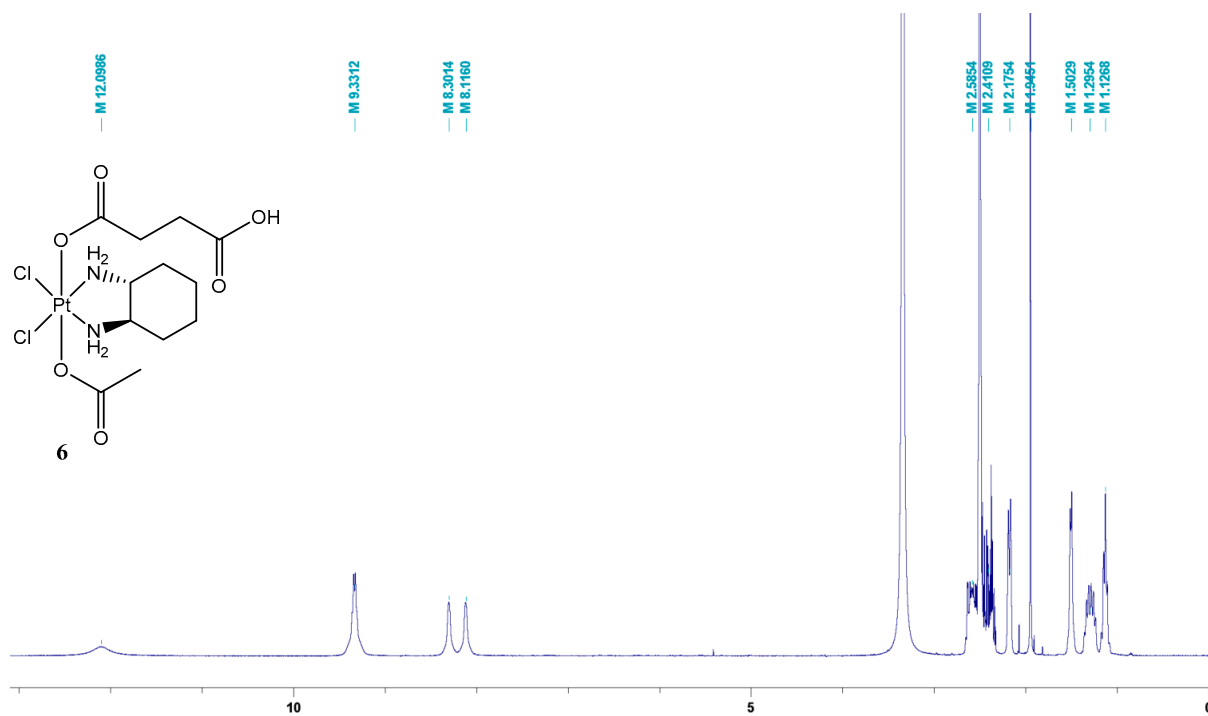

Figure S5. <sup>1</sup>H NMR spectrum of complex 6 in d<sub>6</sub>-DMSO.

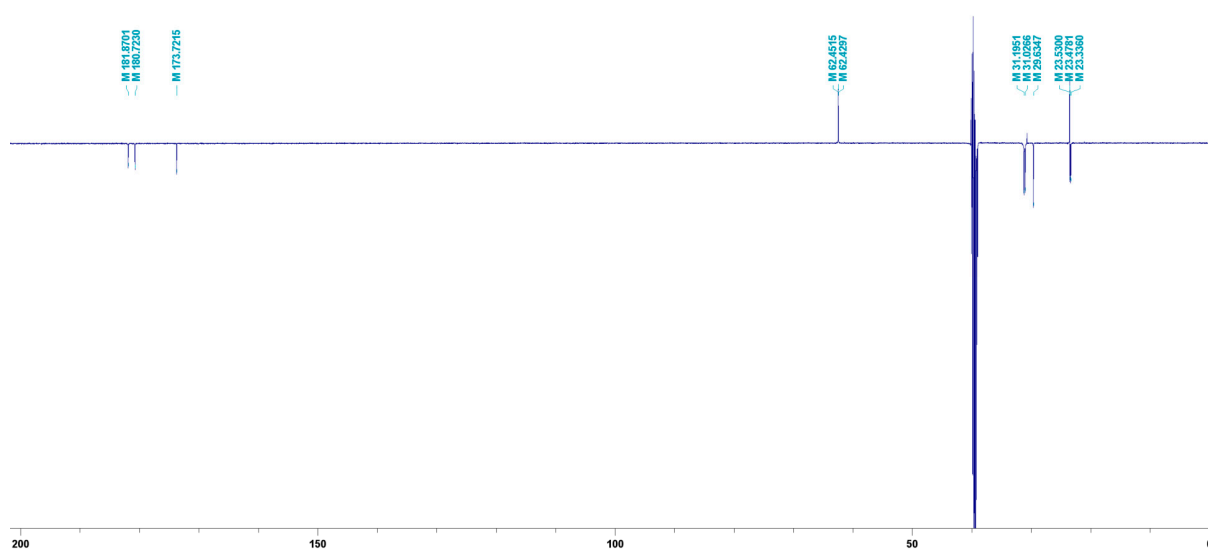

Figure S6. <sup>13</sup>C NMR spectrum of complex 6 in d<sub>6</sub>-DMSO.

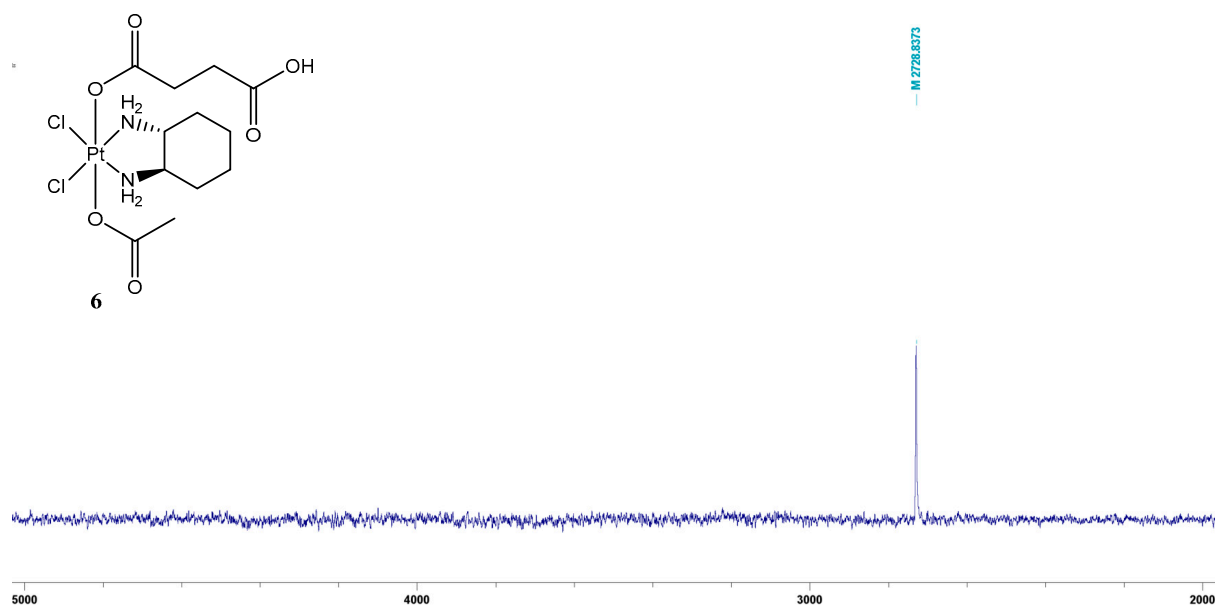

**Figure S7.**  $^{195}\text{Pt}$  NMR spectrum of complex **6** in  $\text{d}_6$ -DMSO.

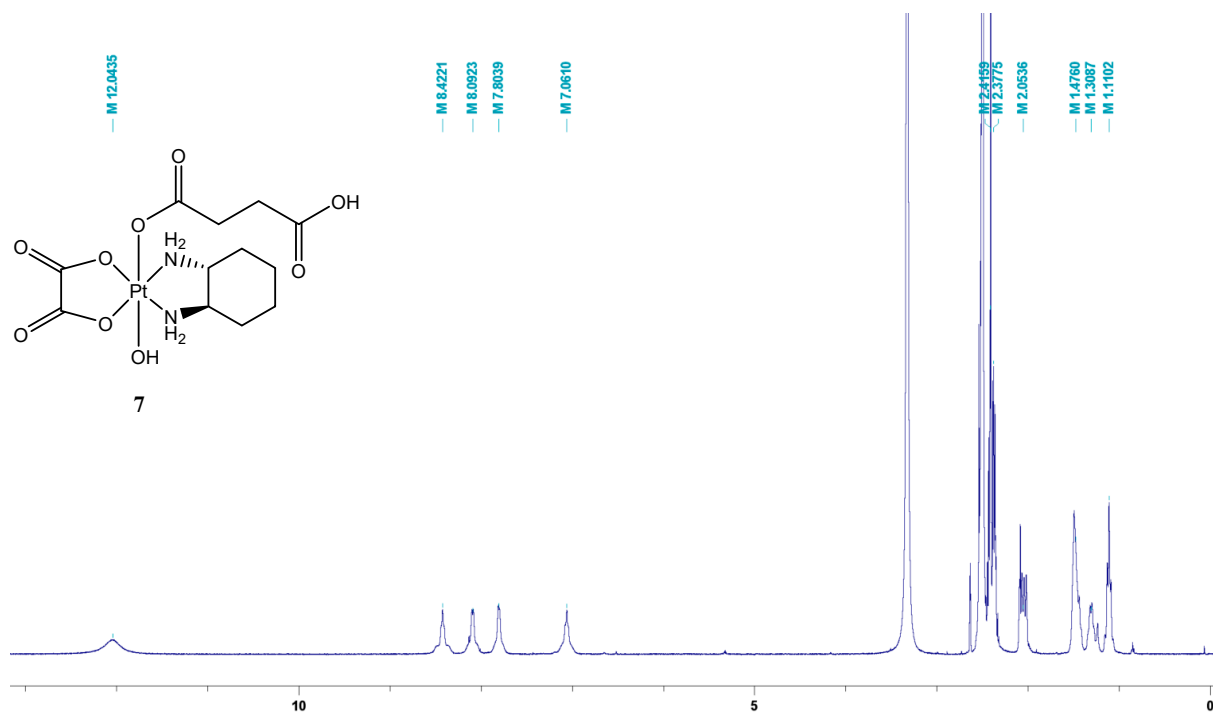

**Figure S8.**  $^1\text{H}$  NMR spectrum of complex **7** in  $\text{d}_6\text{-DMSO}$ .

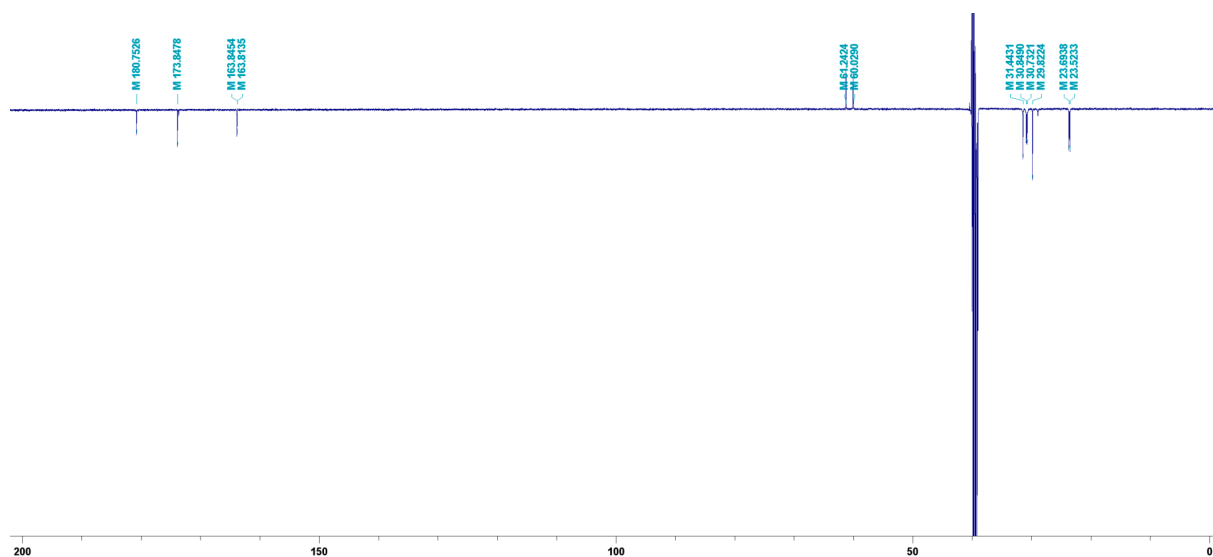

**Figure S9.**  $^{13}\text{C}$  NMR spectrum of complex **7** in  $\text{d}_6\text{-DMSO}$ .

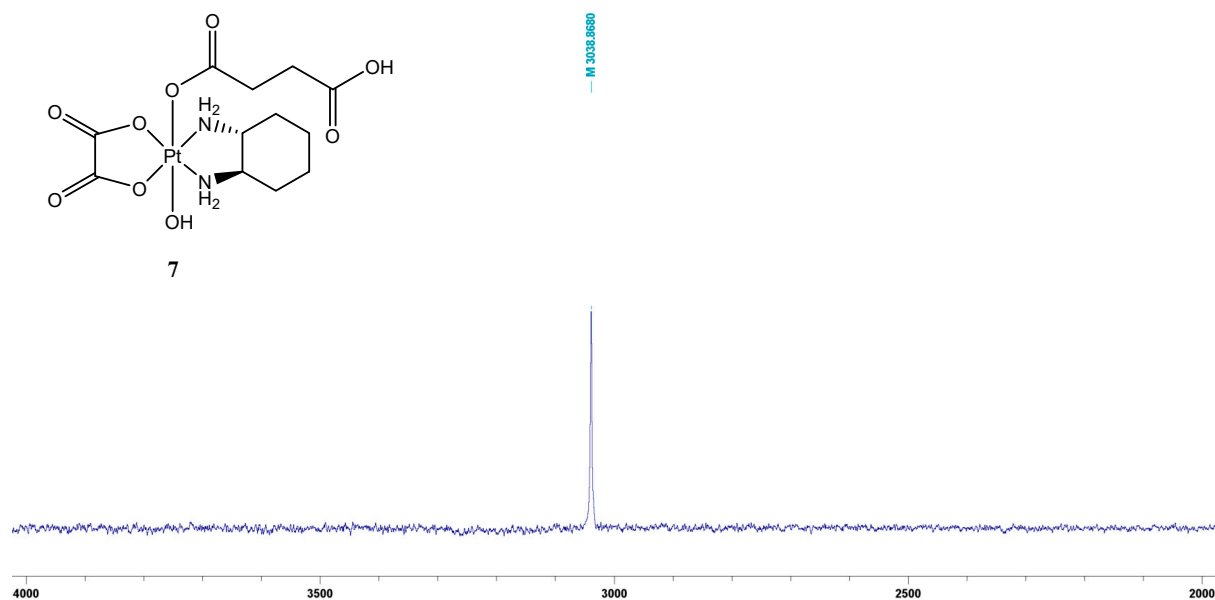

**Figure S10.**  $^{195}\text{Pt}$  NMR spectrum of complex **7** in  $\text{d}_6\text{-DMSO}$ .



## 2. NMR Spectra of Selected Conjugates

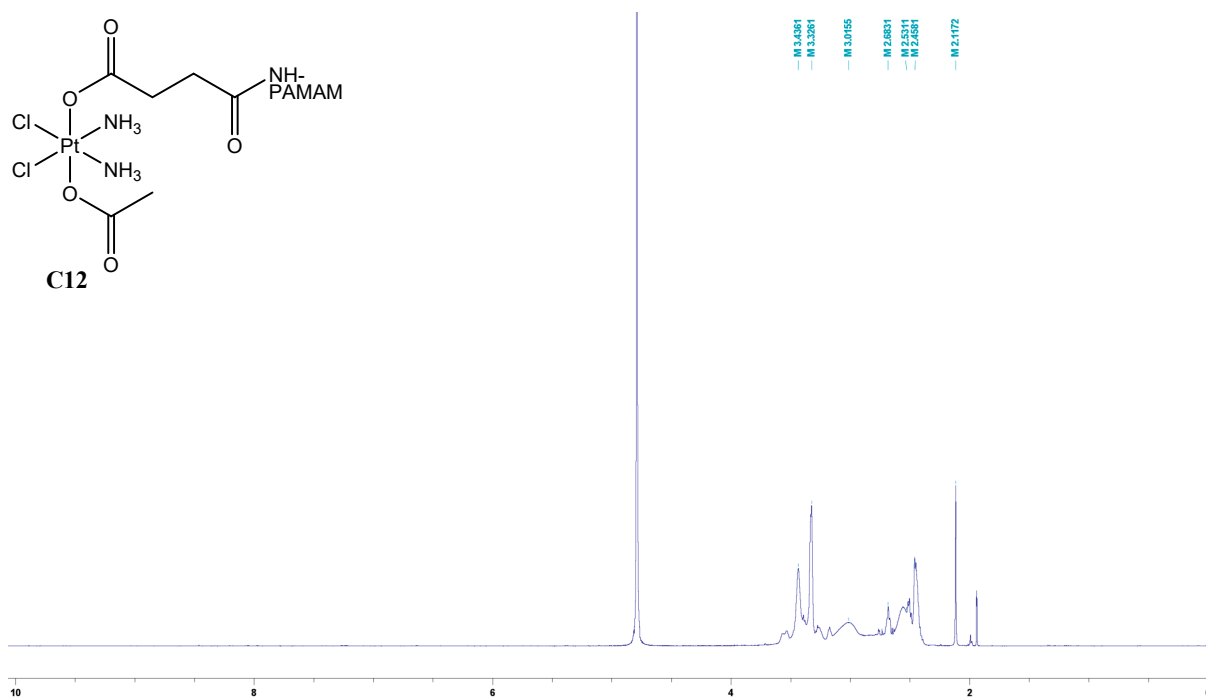

**Figure S11.** <sup>1</sup>H NMR spectrum of conjugate **C12** in D<sub>2</sub>O.

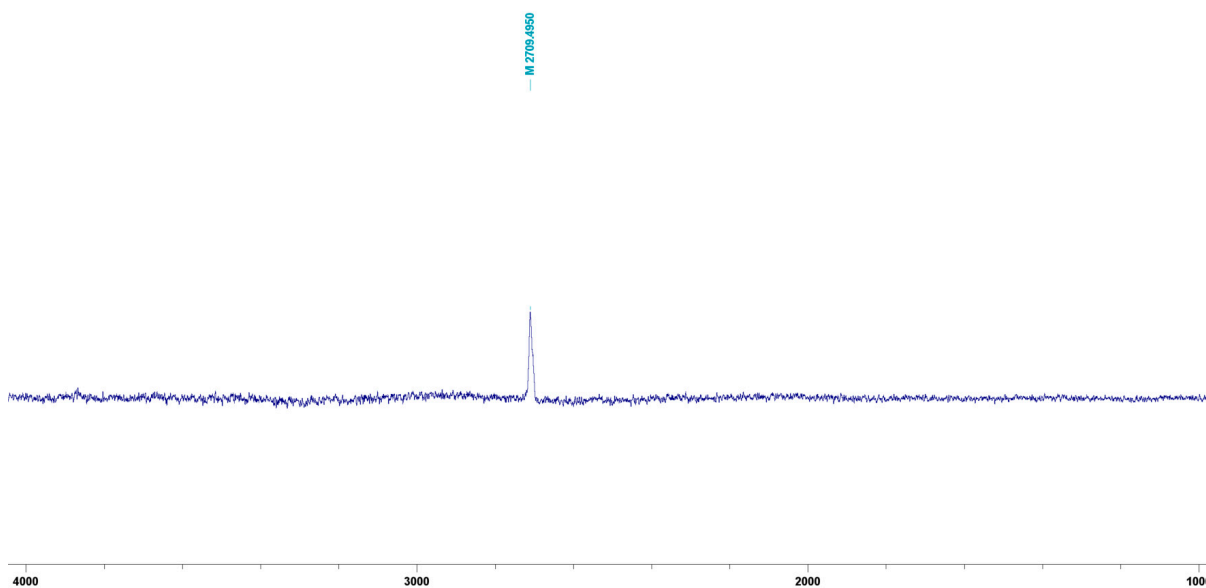

**Figure S12.** <sup>195</sup>Pt NMR spectrum of conjugate **C12** in D<sub>2</sub>O.

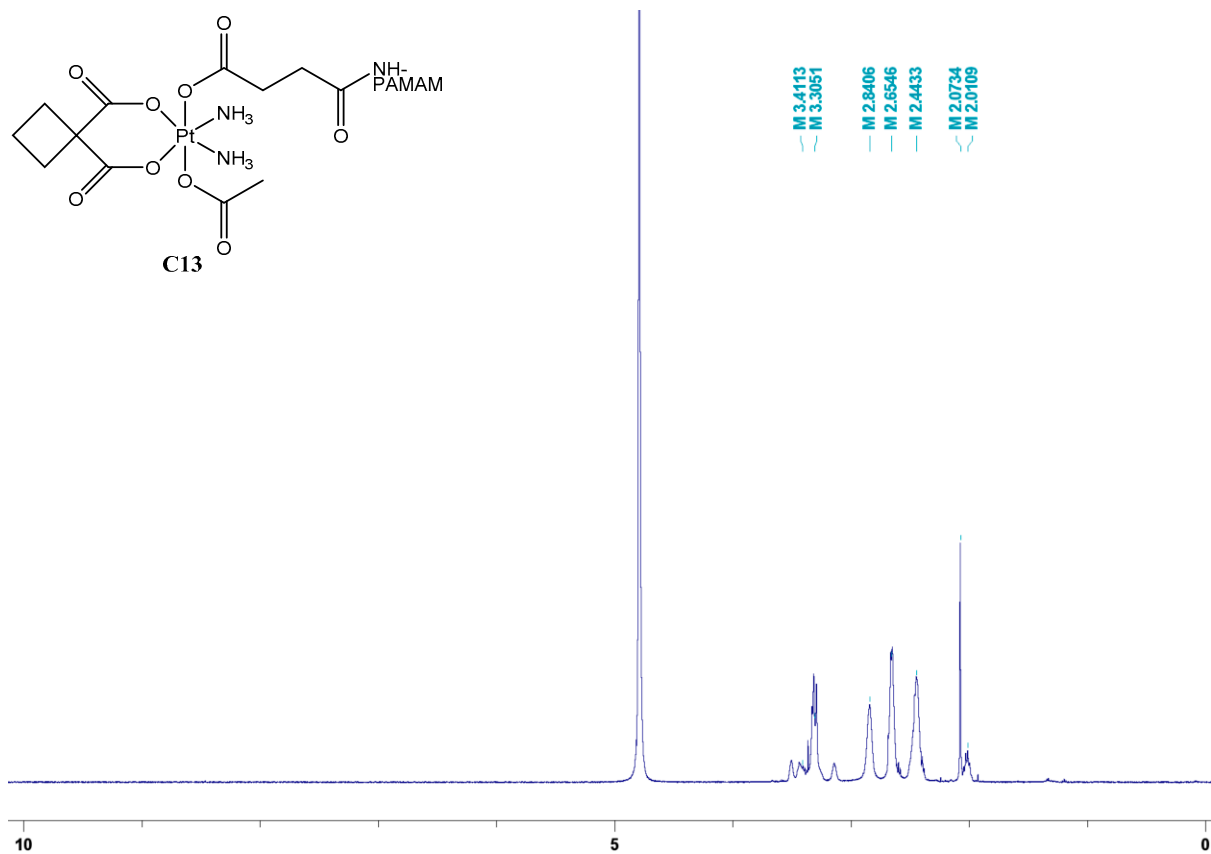

**Figure S13.**  $^1\text{H}$  NMR spectrum of conjugate **C13** in  $\text{D}_2\text{O}$ .

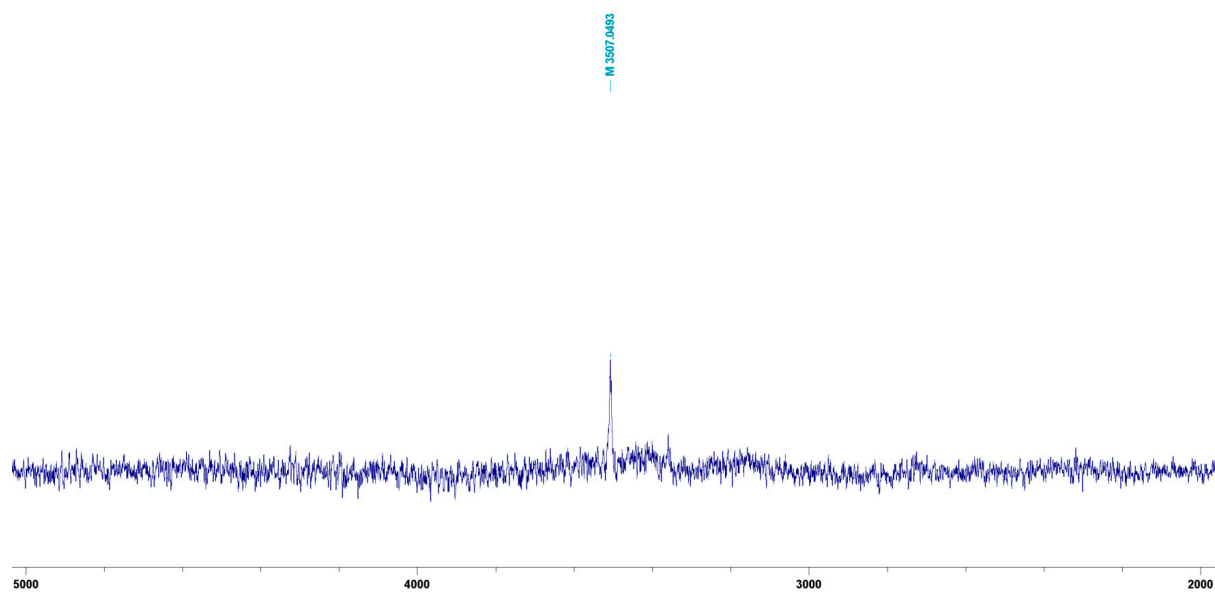

**Figure S14.**  $^{195}\text{Pt}$  NMR spectrum of conjugate **C13** in  $\text{D}_2\text{O}$ .

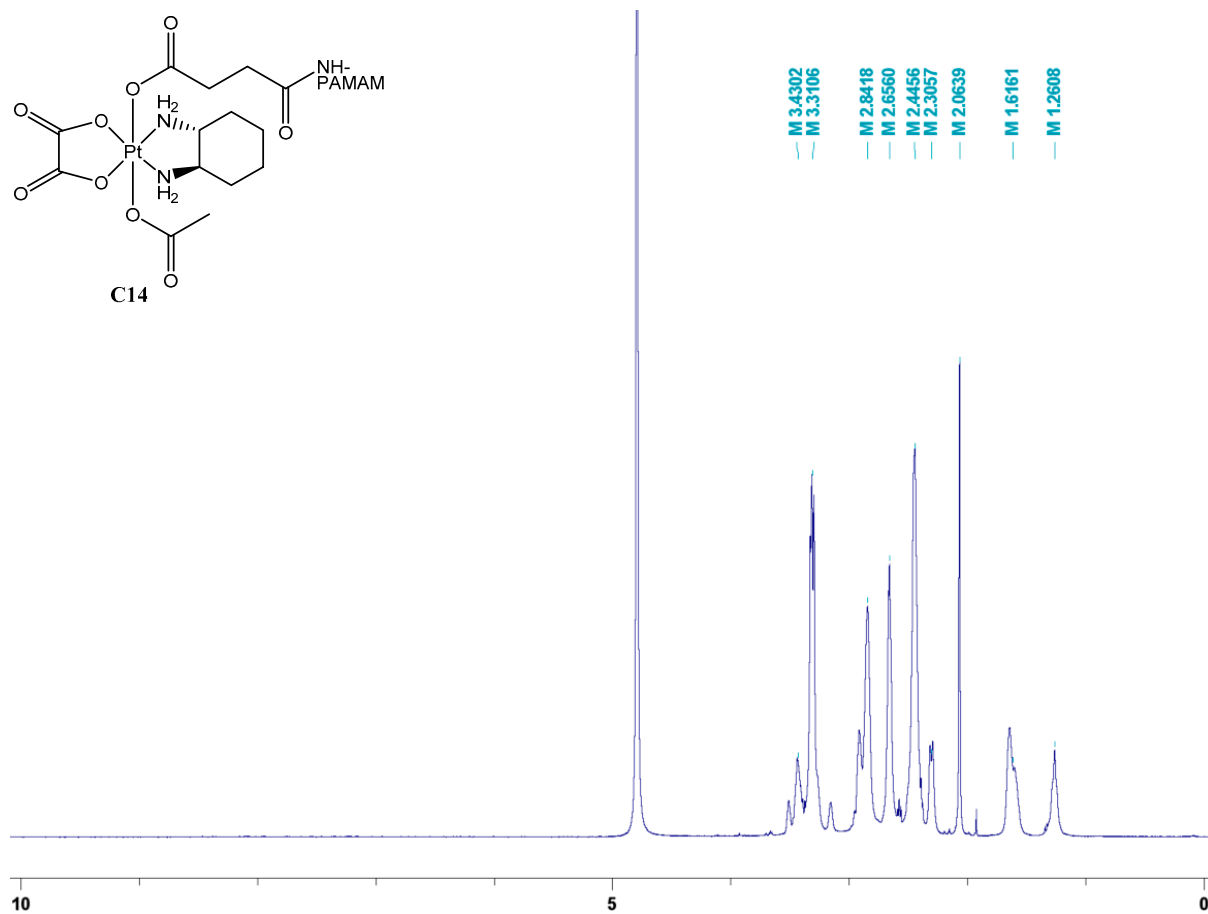

**Figure S15.** <sup>1</sup>H NMR spectrum of conjugate **C14** in D<sub>2</sub>O.

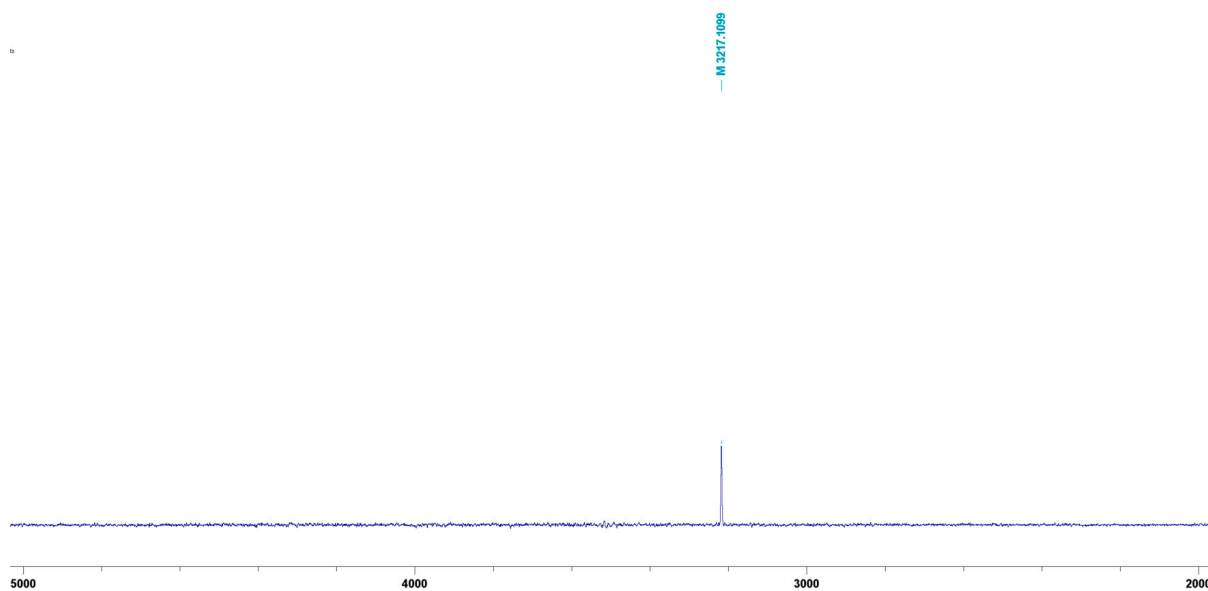

**Figure S16.** <sup>195</sup>Pt NMR spectrum of conjugate **C14** in D<sub>2</sub>O.

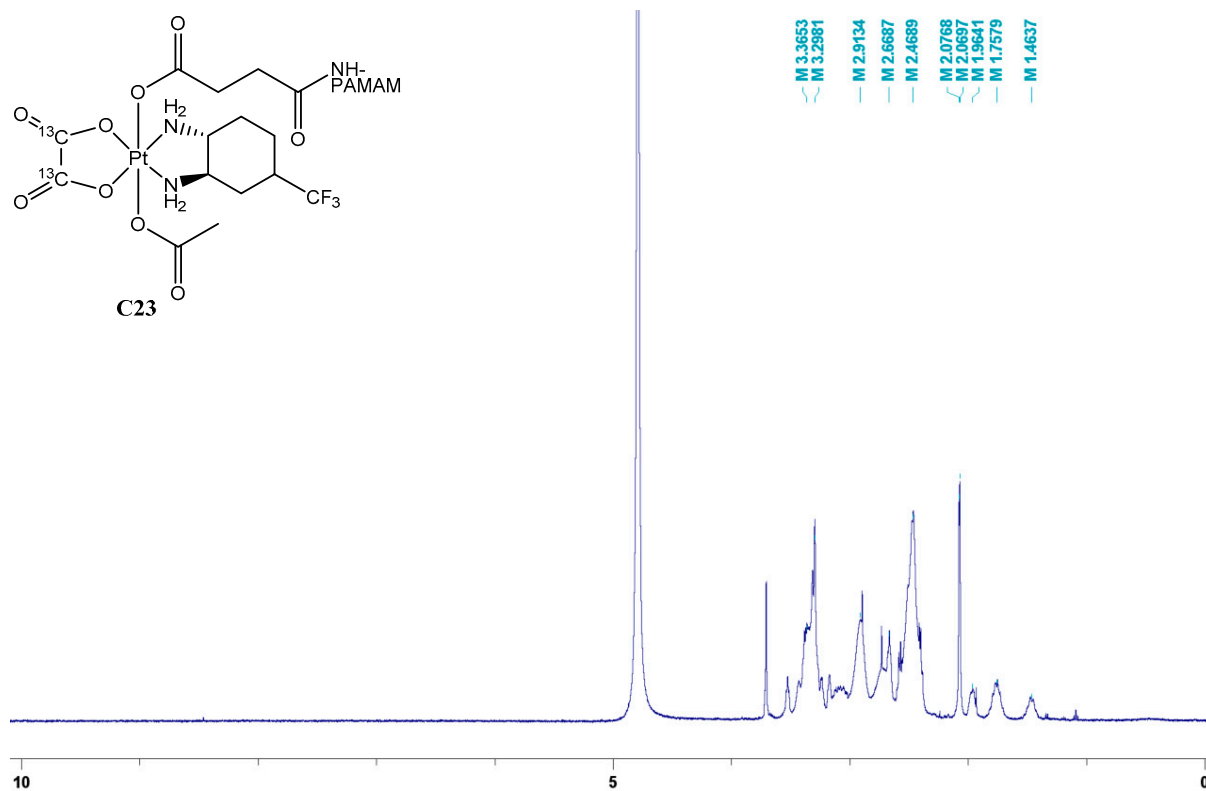

**Figure S17.**  $^1\text{H}$  NMR spectrum of conjugate **C23** in  $\text{D}_2\text{O}$ .

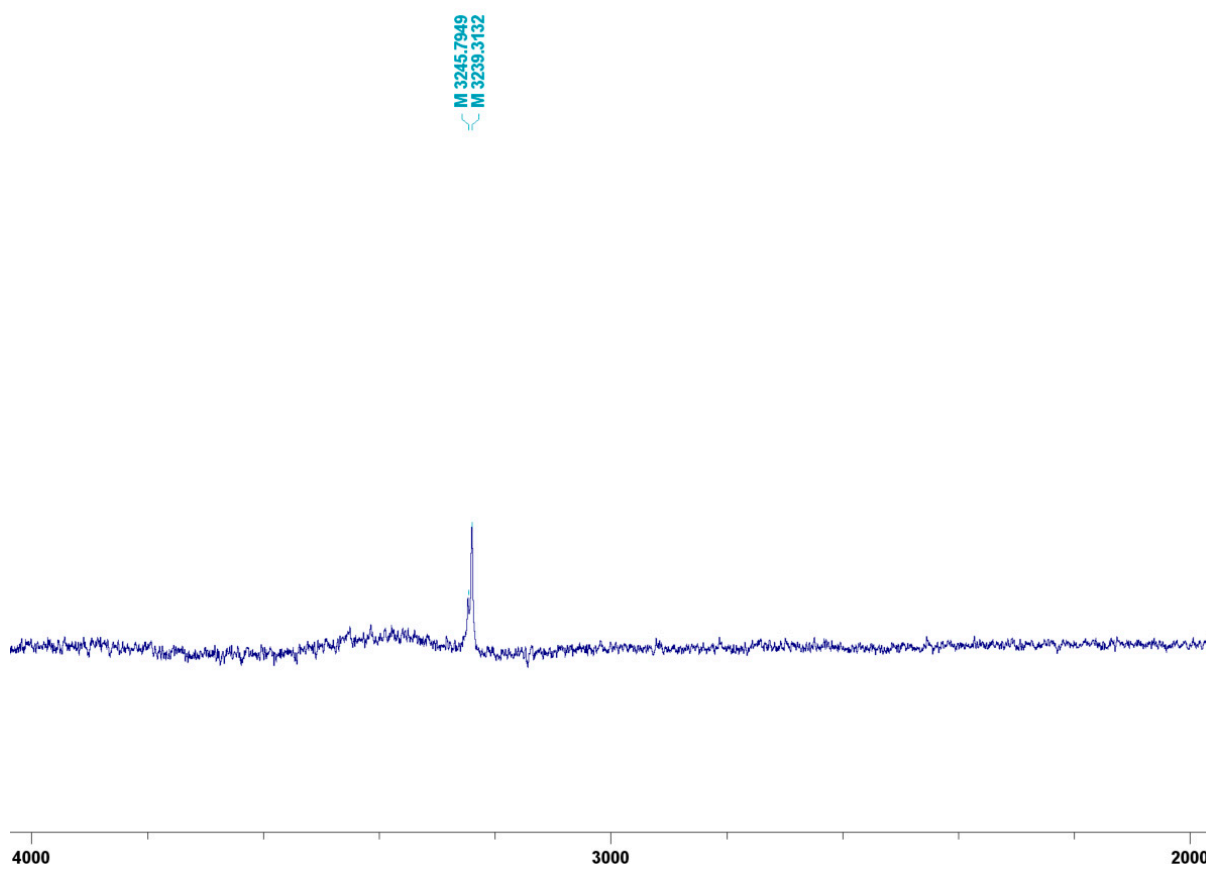

**Figure S18.**  $^{195}\text{Pt}$  NMR spectrum of conjugate **C23** in  $\text{D}_2\text{O}$ .

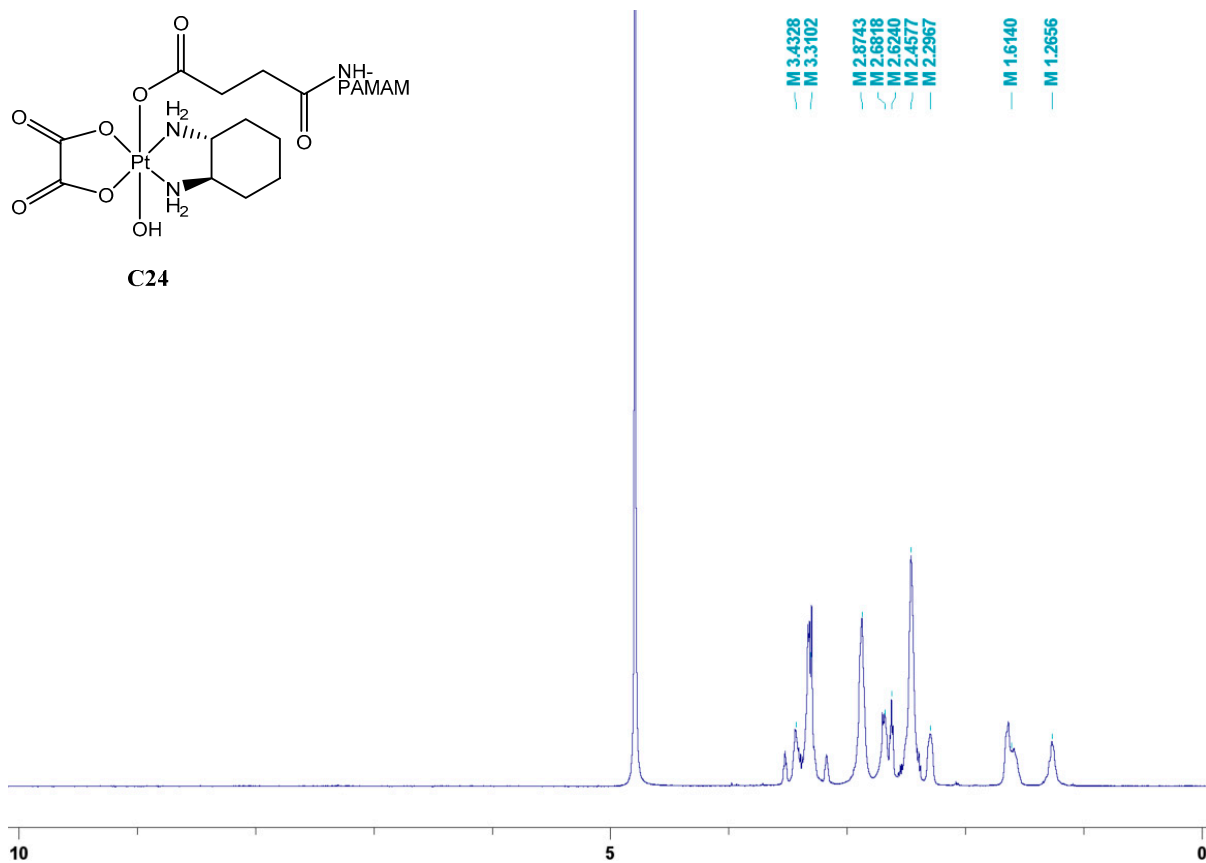

**Figure S19.**  $^1\text{H}$  NMR spectrum of conjugate **C24** in  $\text{D}_2\text{O}$ .

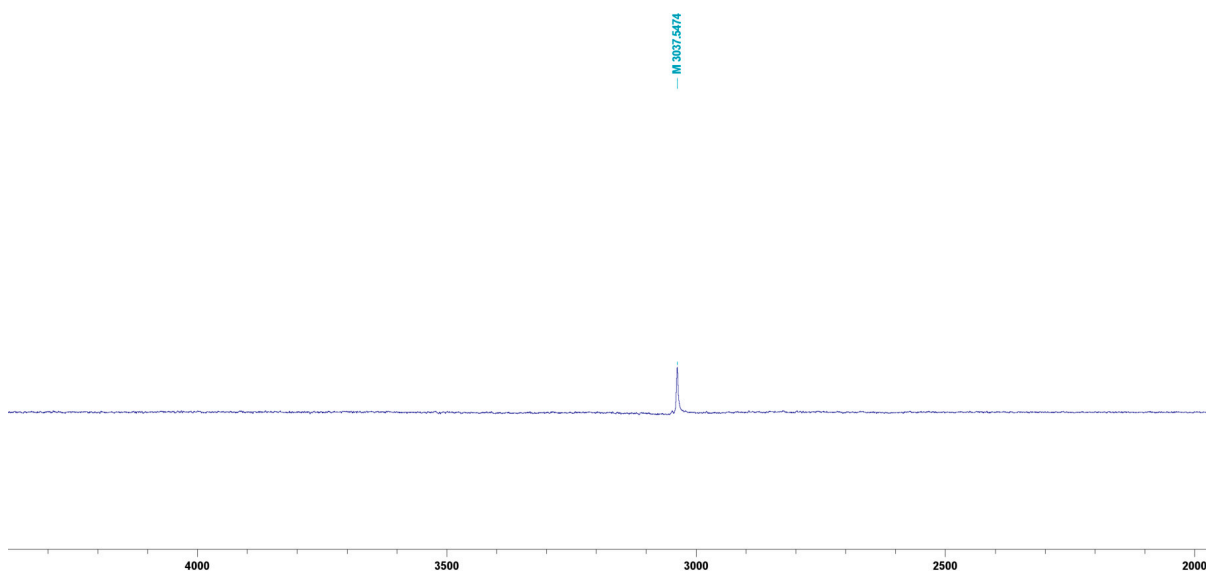

**Figure S20.**  $^{195}\text{Pt}$  NMR spectrum of conjugate **C24** in  $\text{D}_2\text{O}$ .

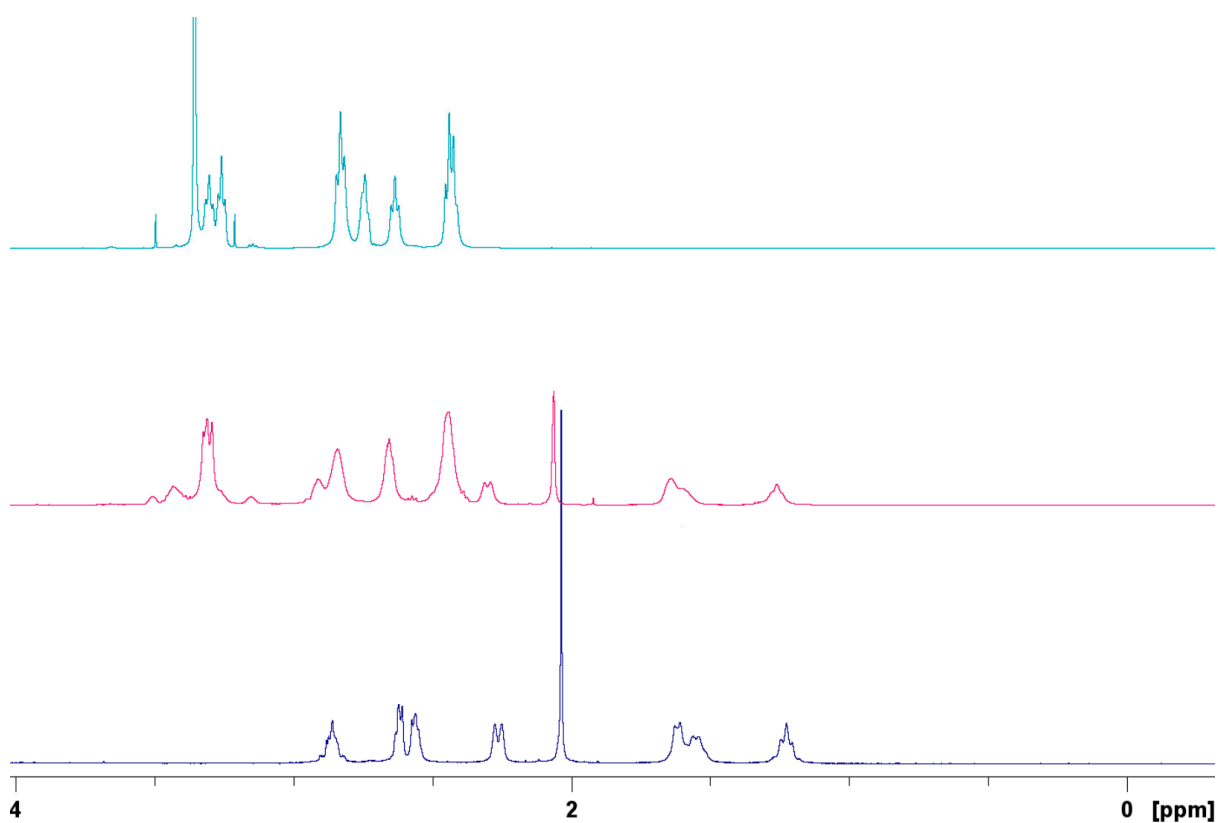

**Figure S21.**  $^1\text{H}$  NMR spectra measured in  $\text{D}_2\text{O}$  of G4 PAMAM (top, turquoise), conjugate **C14** (middle, pink) and platinum(IV) complex **3** (bottom, dark blue).

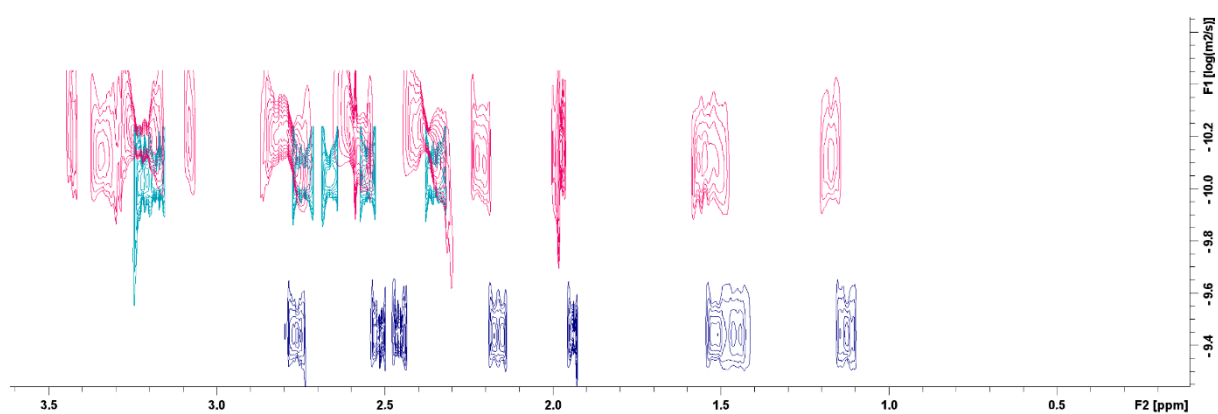

**Figure S22.** Overlay of DOSY spectra of conjugate **C14** (top, pink), G4 PAMAM (middle, turquoise) and platinum(IV) complex **3** (bottom, dark blue).

### 3. X-Ray Diffraction Analysis

X-ray intensity data was measured on Bruker D8 Venture diffractometer equipped with multilayer monochromator, Mo K/ $\alpha$  INCOATEC micro focus sealed tube and Oxford cooling system. The structure was solved by Direct Methods. Non-hydrogen atoms were refined with anisotropic displacement parameters. Hydrogen atoms were inserted at calculated positions and refined with riding model. The following software was used: Bruker SAINT software package [1] using a narrow-frame algorithm for frame integration, SADABS [2] for absorption correction, OLEX2 [3] for structure solution, refinement, molecular diagrams and graphical user-interface, ShelXle [4] for refinement and graphical user-interface SHELXS-2015 [5] for structure solution, SHELXL-2015 [6] for refinement, Platon [7] for symmetry check. Crystallographic data have been deposited with the Cambridge Crystallographic Data Center with No. CSD 2252655. Copies of data can be obtained free of charge (available online: <https://www.ccdc.cam.ac.uk/structures/>).

**Table S1.** Overview of the sample and crystal data, data collection and structure refinement of platinum(IV) complex **3**.

|                                                   |                                                                   |
|---------------------------------------------------|-------------------------------------------------------------------|
| <b>Identification code</b>                        | mo_KrYv410_P212121                                                |
| <b>Empirical formula</b>                          | C <sub>14</sub> H <sub>26</sub> N <sub>2</sub> O <sub>12</sub> Pt |
| <b>Formula weight</b>                             | 609.46                                                            |
| <b>Temperature/K</b>                              | 100.0                                                             |
| <b>Crystal system</b>                             | orthorhombic                                                      |
| <b>Space group</b>                                | P2 <sub>1</sub> 2 <sub>1</sub> 2 <sub>1</sub>                     |
| <b>a/Å</b>                                        | 9.1152(2)                                                         |
| <b>b/Å</b>                                        | 11.2755(2)                                                        |
| <b>c/Å</b>                                        | 19.5809(4)                                                        |
| <b>α/°</b>                                        | 90                                                                |
| <b>β/°</b>                                        | 90                                                                |
| <b>γ/°</b>                                        | 90                                                                |
| <b>Volume/Å<sup>3</sup></b>                       | 2012.49(7)                                                        |
| <b>Z</b>                                          | 4                                                                 |
| <b>ρ<sub>calc</sub>/g/cm<sup>3</sup></b>          | 2.011                                                             |
| <b>μ/mm<sup>-1</sup></b>                          | 7.037                                                             |
| <b>F(000)</b>                                     | 1192.0                                                            |
| <b>Crystal size/mm<sup>3</sup></b>                | 0.1 × 0.05 × 0.03                                                 |
| <b>Radiation</b>                                  | MoKα (λ = 0.71073)                                                |
| <b>2θ range for data collection/°</b>             | 4.16 to 60.364                                                    |
| <b>Index ranges</b>                               | -12 ≤ h ≤ 12, -15 ≤ k ≤ 15, -27 ≤ l ≤ 23                          |
| <b>Reflections collected</b>                      | 21714                                                             |
| <b>Independent reflections</b>                    | 5890 [R <sub>int</sub> = 0.0657, R <sub>sigma</sub> = 0.0684]     |
| <b>Data/restraints/parameters</b>                 | 5890/12/280                                                       |
| <b>Goodness-of-fit on F<sup>2</sup></b>           | 1.023                                                             |
| <b>Final R indexes [I ≥ 2σ (I)]</b>               | R <sub>1</sub> = 0.0346, wR <sub>2</sub> = 0.0485                 |
| <b>Final R indexes [all data]</b>                 | R <sub>1</sub> = 0.0484, wR <sub>2</sub> = 0.0518                 |
| <b>Largest diff. peak/hole / e Å<sup>-3</sup></b> | 0.85/-1.16                                                        |
| <b>Flack parameter</b>                            | -0.025(6)                                                         |

**Table S2.** Overview of bond lengths of platinum(IV) complex **3**.

| Atom | Atom | Length [Å] | Atom | Atom | Length [Å] |
|------|------|------------|------|------|------------|
|------|------|------------|------|------|------------|



|     |     |          |     |     |           |
|-----|-----|----------|-----|-----|-----------|
| Pt1 | O1  | 2.004(4) | N1  | C1  | 1.490(8)  |
| Pt1 | O5  | 2.010(4) | N2  | C2  | 1.499(8)  |
| Pt1 | O6  | 2.009(4) | C1  | C2  | 1.489(9)  |
| Pt1 | O9  | 2.002(4) | C1  | C6  | 1.531(9)  |
| Pt1 | N1  | 2.031(5) | C2  | C3  | 1.539(9)  |
| Pt1 | N2  | 2.034(5) | C3  | C4  | 1.530(9)  |
| O1  | C7  | 1.308(7) | C4  | C5  | 1.510(10) |
| O2  | C7  | 1.237(7) | C5  | C6  | 1.527(9)  |
| O3  | C10 | 1.194(7) | C7  | C8  | 1.508(8)  |
| O5  | C11 | 1.313(8) | C8  | C9  | 1.510(8)  |
| O6  | C12 | 1.304(7) | C9  | C10 | 1.498(9)  |
| O7  | C11 | 1.210(8) | C10 | O4  | 1.353(14) |
| O8  | C12 | 1.217(8) | C10 | O4Z | 1.362(13) |
| O9  | C13 | 1.301(8) | C11 | C12 | 1.543(9)  |
| O10 | C13 | 1.227(8) | C13 | C14 | 1.494(9)  |

**Table S3.** Overview of angles of platinum(IV) complex **3**.

| Atom | Atom | Atom | Angle [°] | Atom | Atom | Atom | Angle [°] |
|------|------|------|-----------|------|------|------|-----------|
| O1   | Pt1  | O5   | 95.13(18) | C1   | C2   | N2   | 106.3(5)  |
| O1   | Pt1  | O6   | 94.81(18) | C1   | C2   | C3   | 112.0(5)  |
| O1   | Pt1  | N1   | 84.0(2)   | C4   | C3   | C2   | 108.9(6)  |
| O1   | Pt1  | N2   | 86.5(2)   | C5   | C4   | C3   | 111.8(6)  |
| O5   | Pt1  | N1   | 97.0(2)   | C4   | C5   | C6   | 111.1(6)  |
| O5   | Pt1  | N2   | 178.3(2)  | O1   | C7   | C8   | 113.6(5)  |
| O6   | Pt1  | O5   | 84.74(16) | O2   | C7   | O1   | 125.0(5)  |
| O6   | Pt1  | N1   | 177.9(2)  | O2   | C7   | C8   | 121.4(5)  |
| O6   | Pt1  | N2   | 94.7(2)   | C7   | C8   | C9   | 114.8(5)  |
| O9   | Pt1  | O1   | 177.1(2)  | C10  | C9   | C8   | 115.8(5)  |
| O9   | Pt1  | O5   | 86.66(19) | O3   | C10  | C9   | 124.4(6)  |
| O9   | Pt1  | O6   | 83.11(18) | O3   | C10  | O4   | 119.6(8)  |
| O9   | Pt1  | N1   | 98.1(2)   | O3   | C10  | O4Z  | 121.5(8)  |
| O9   | Pt1  | N2   | 91.7(2)   | O4   | C10  | C9   | 112.1(8)  |
| N1   | Pt1  | N2   | 83.59(19) | O4Z  | C10  | C9   | 111.4(7)  |
| C7   | O1   | Pt1  | 124.4(4)  | O5   | C11  | C12  | 116.2(7)  |
| C11  | O5   | Pt1  | 111.2(4)  | O7   | C11  | O5   | 123.8(7)  |
| C12  | O6   | Pt1  | 111.2(4)  | O7   | C11  | C12  | 120.0(7)  |
| C13  | O9   | Pt1  | 123.3(5)  | O6   | C12  | C11  | 116.7(7)  |
| C1   | N1   | Pt1  | 108.8(4)  | O8   | C12  | O6   | 122.1(7)  |
| C2   | N2   | Pt1  | 108.4(4)  | O8   | C12  | C11  | 121.2(7)  |
| N1   | C1   | C6   | 113.1(6)  | O9   | C13  | C14  | 112.4(7)  |
| C2   | C1   | N1   | 108.2(5)  | O10  | C13  | O9   | 125.4(7)  |
| C2   | C1   | C6   | 111.3(6)  | O10  | C13  | C14  | 122.1(7)  |
| N2   | C2   | C3   | 112.3(6)  | C5   | C6   | C1   | 109.8(6)  |

#### 4. Concentration-Effect Curves

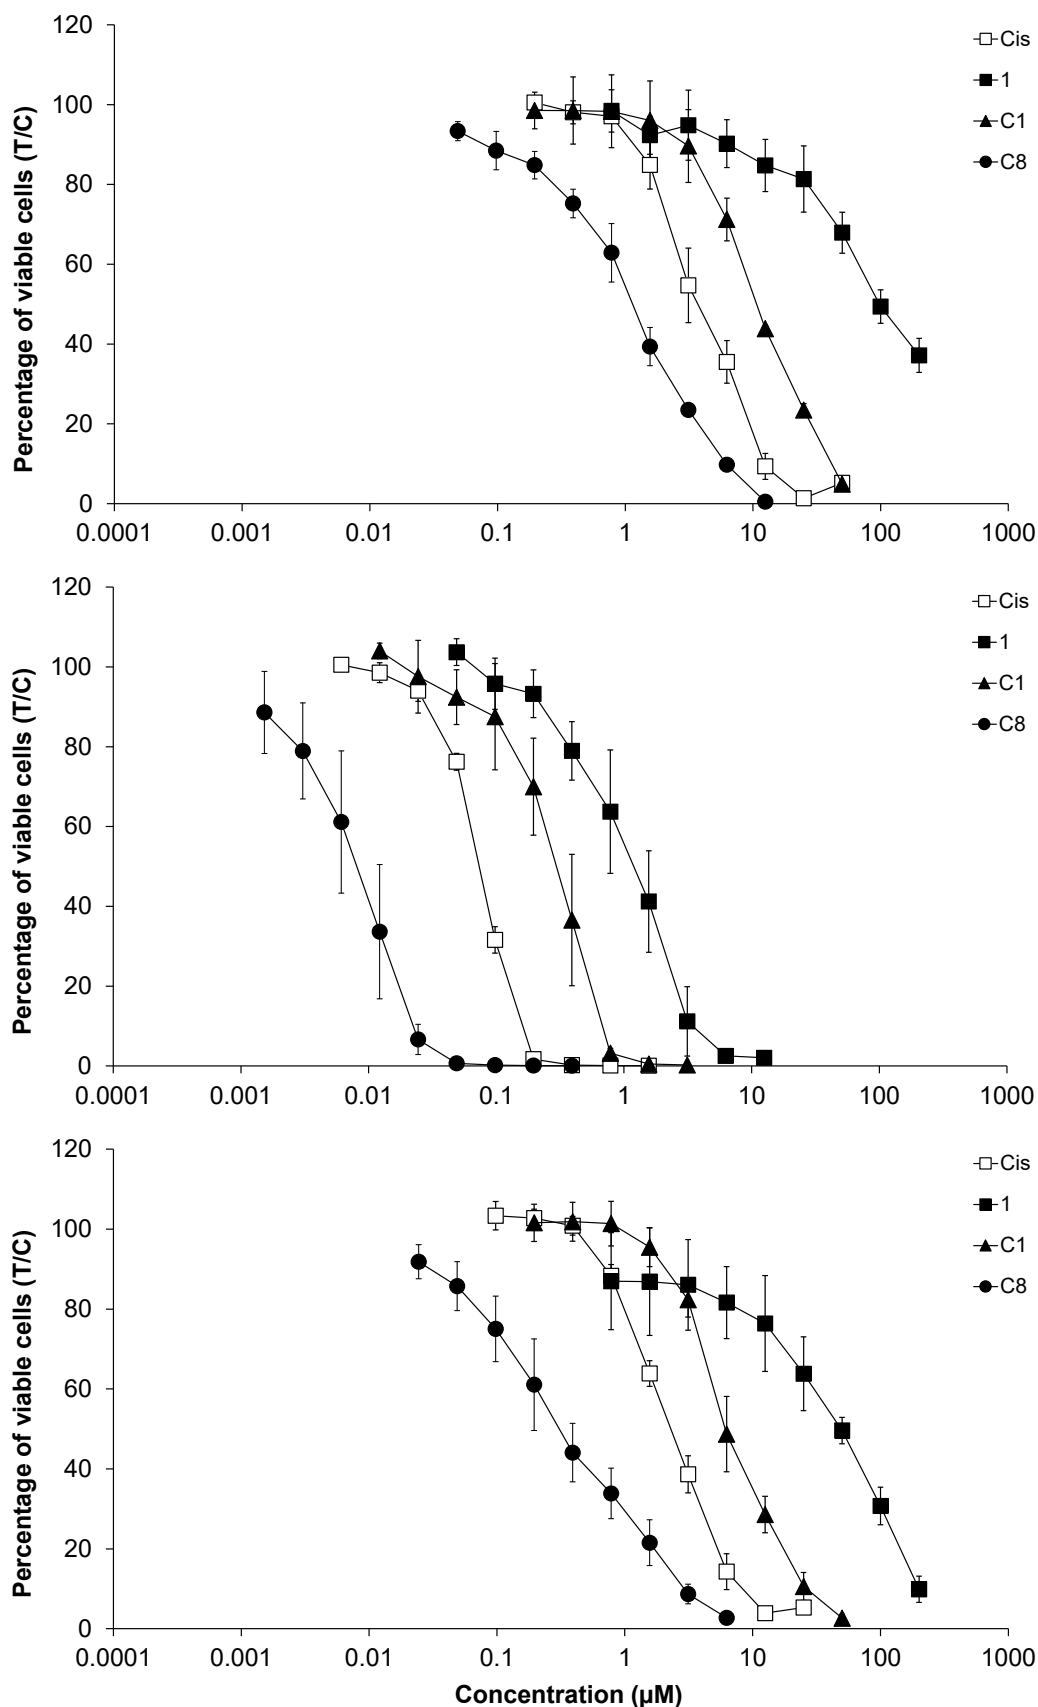

**Figure S23.** Concentration-effect curves of cisplatin, **1**, **C1** and **C8** in A549 (top), CH1/PA-1 (middle) and SW480 (bottom) cells, obtained by MTT assays with 96 h exposure time. Values are means  $\pm$  standard deviations from at least three independent experiments.

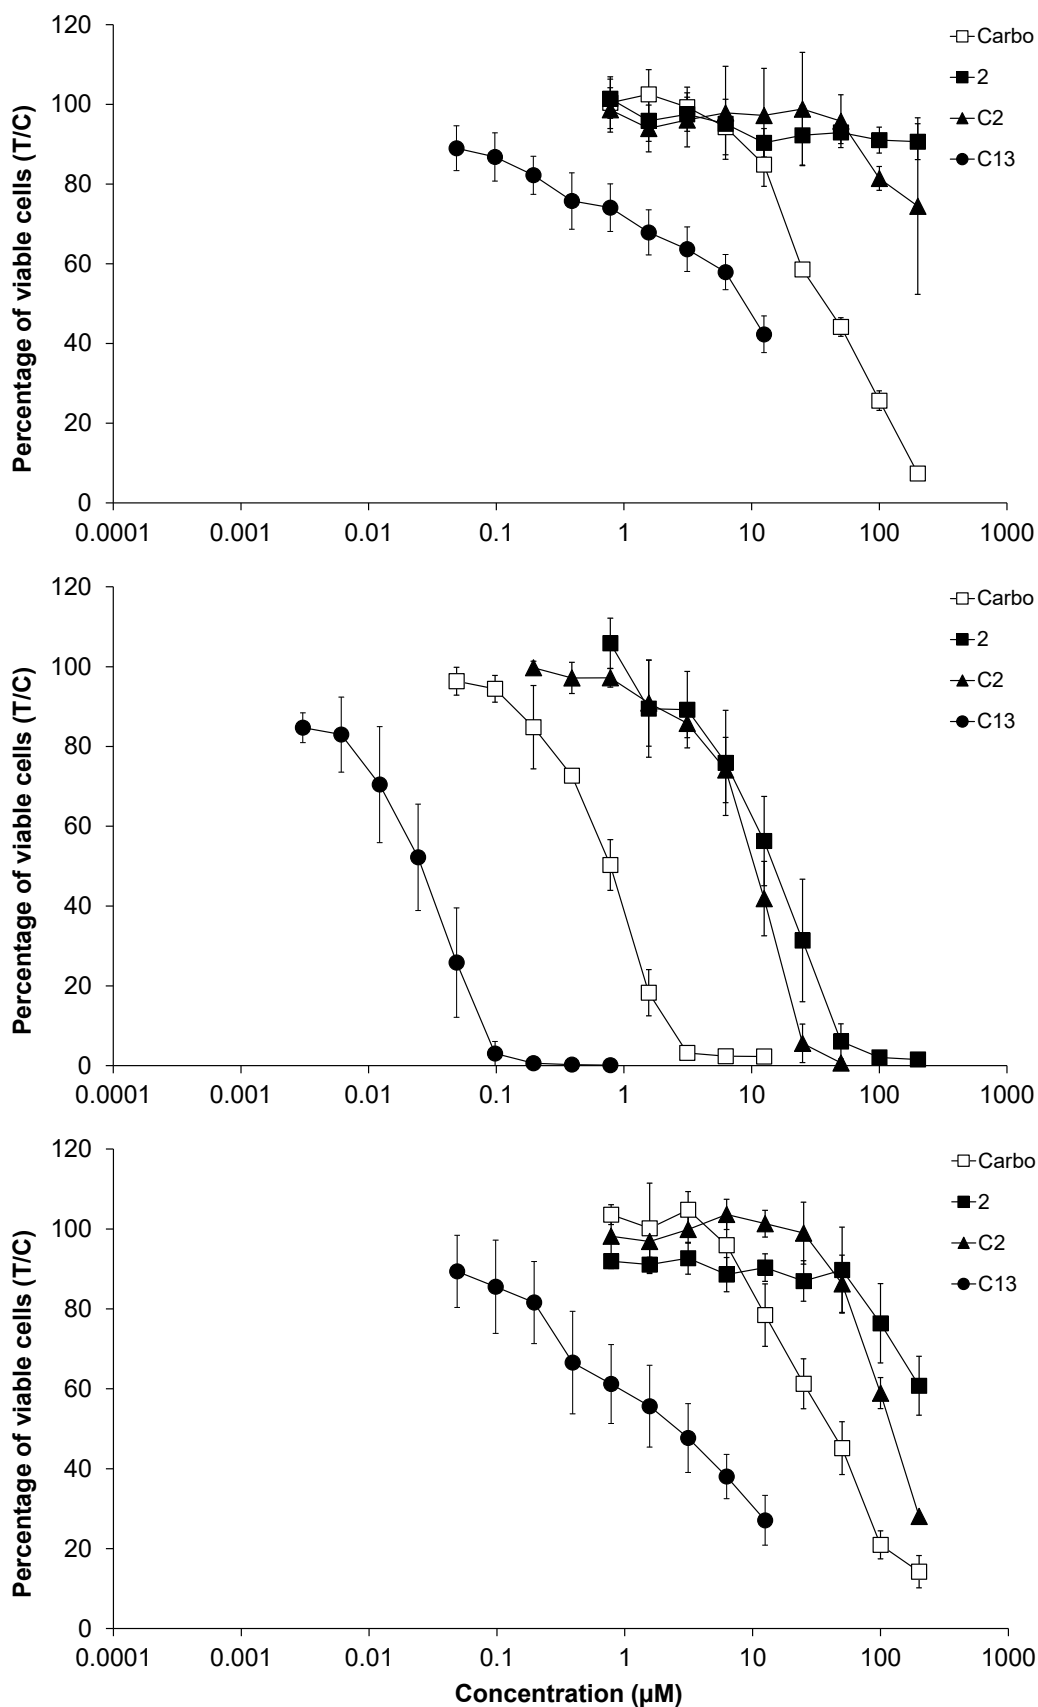

**Figure S24.** Concentration-effect curves of carboplatin, **2**, **C2** and **C13** in A549 (top), CH1/PA-1 (middle) and SW480 (bottom) cells, obtained by MTT assays with 96 h exposure time. Values are means  $\pm$  standard deviations from at least three independent experiments.

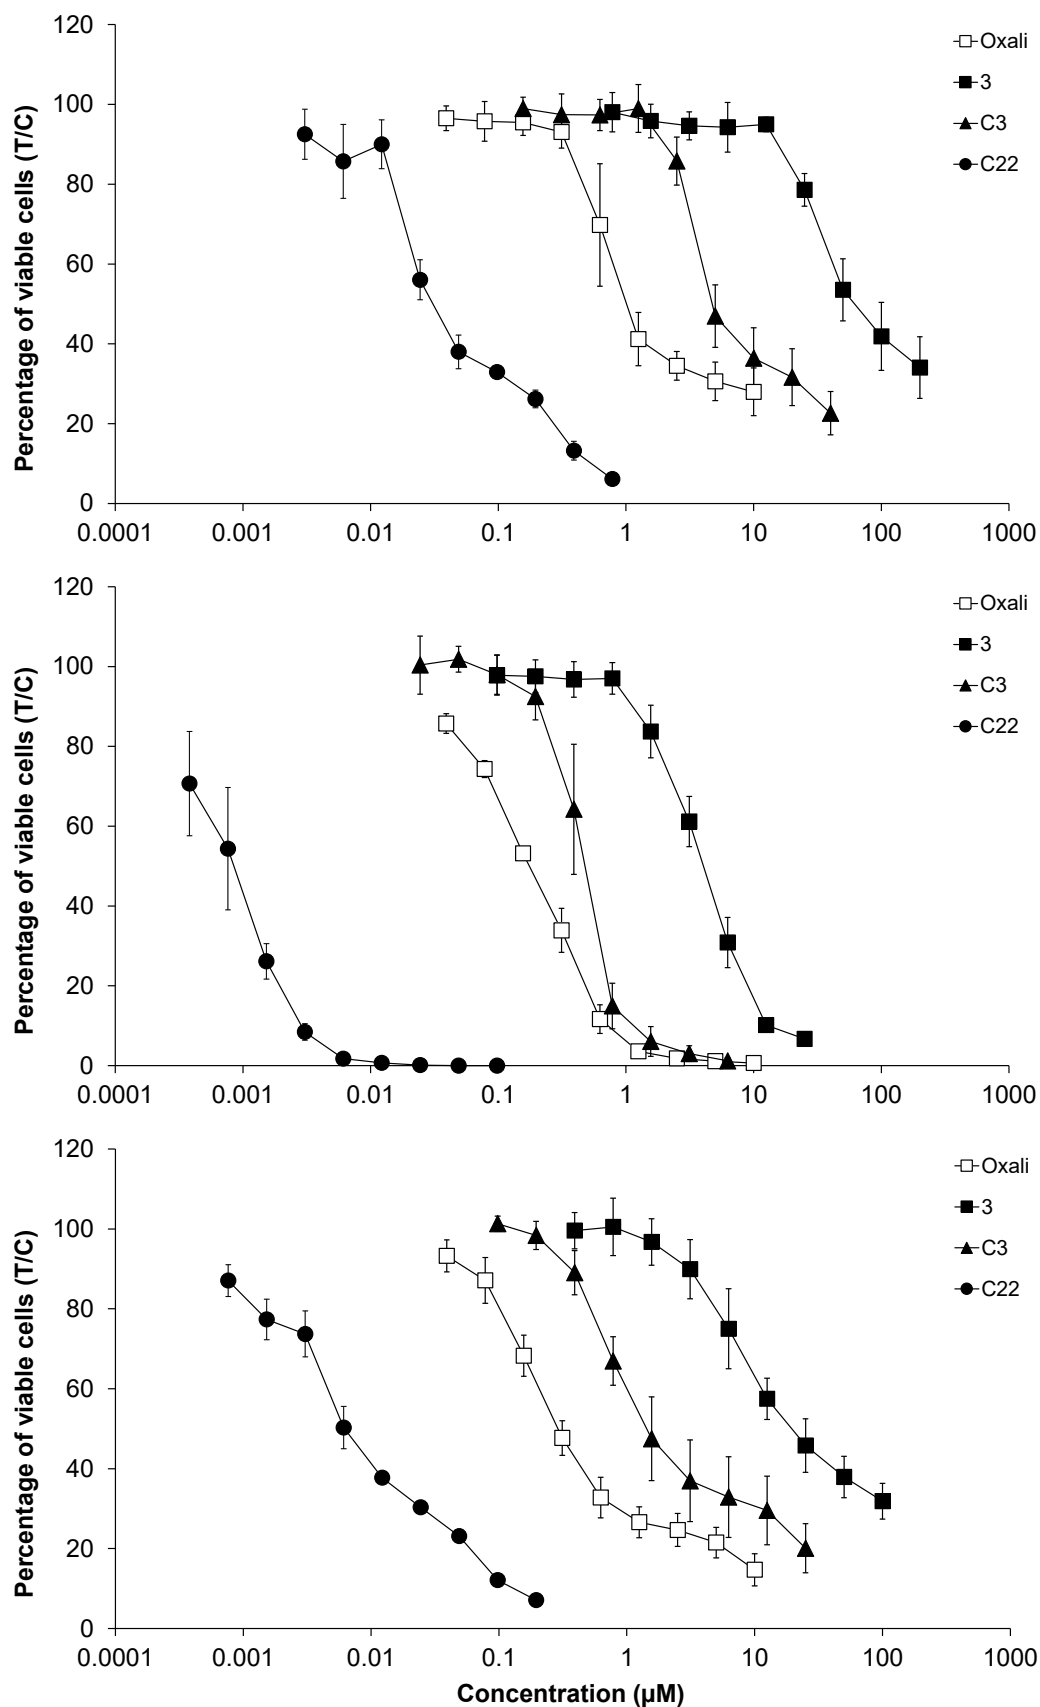

**Figure S25.** Concentration-effect curves of oxaliplatin, **3**, **C3** and **C22** in A549 (top), CH1/PA-1 (middle) and SW480 (bottom) cells, obtained by MTT assays with 96 h exposure time. Values are means  $\pm$  standard deviations from at least three independent experiments.

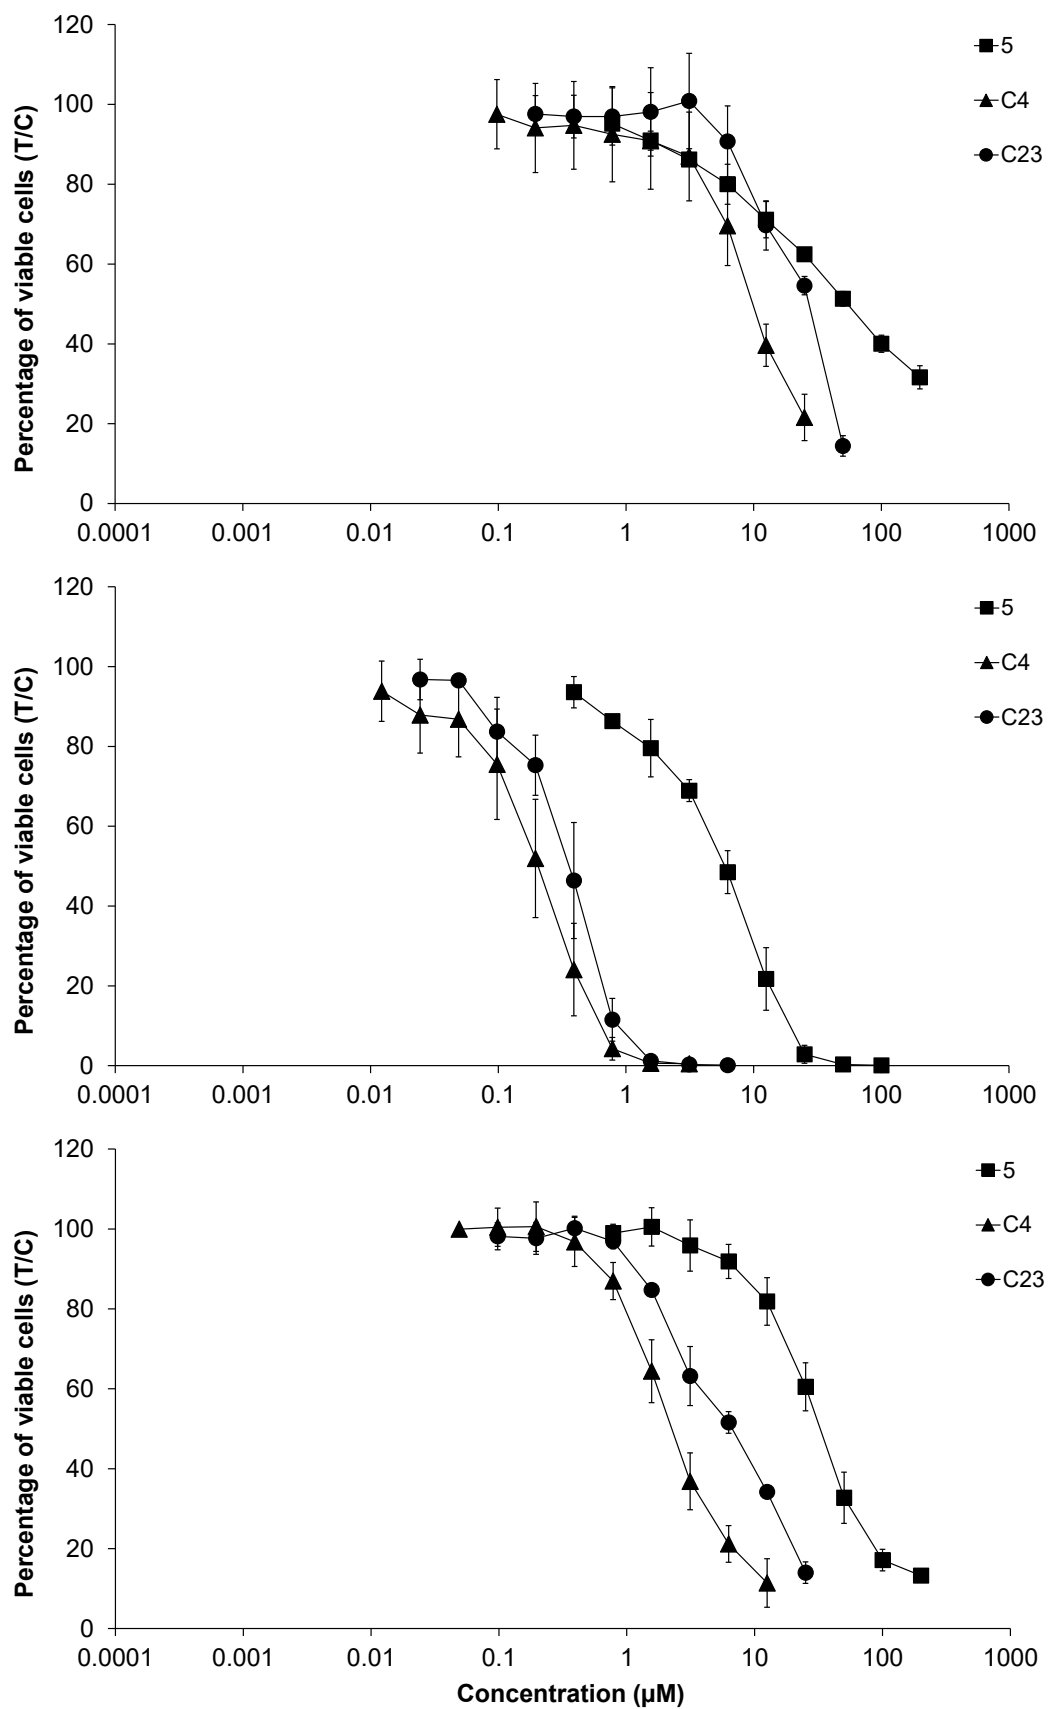

**Figure S26.** Concentration-effect curves of **5**, **C4** and **C23** in A549 (top), CH1/PA-1 (middle) and SW480 (bottom) cells, obtained by MTT assays with 96 h exposure time. Values are means  $\pm$  standard deviations from at least three independent experiments.

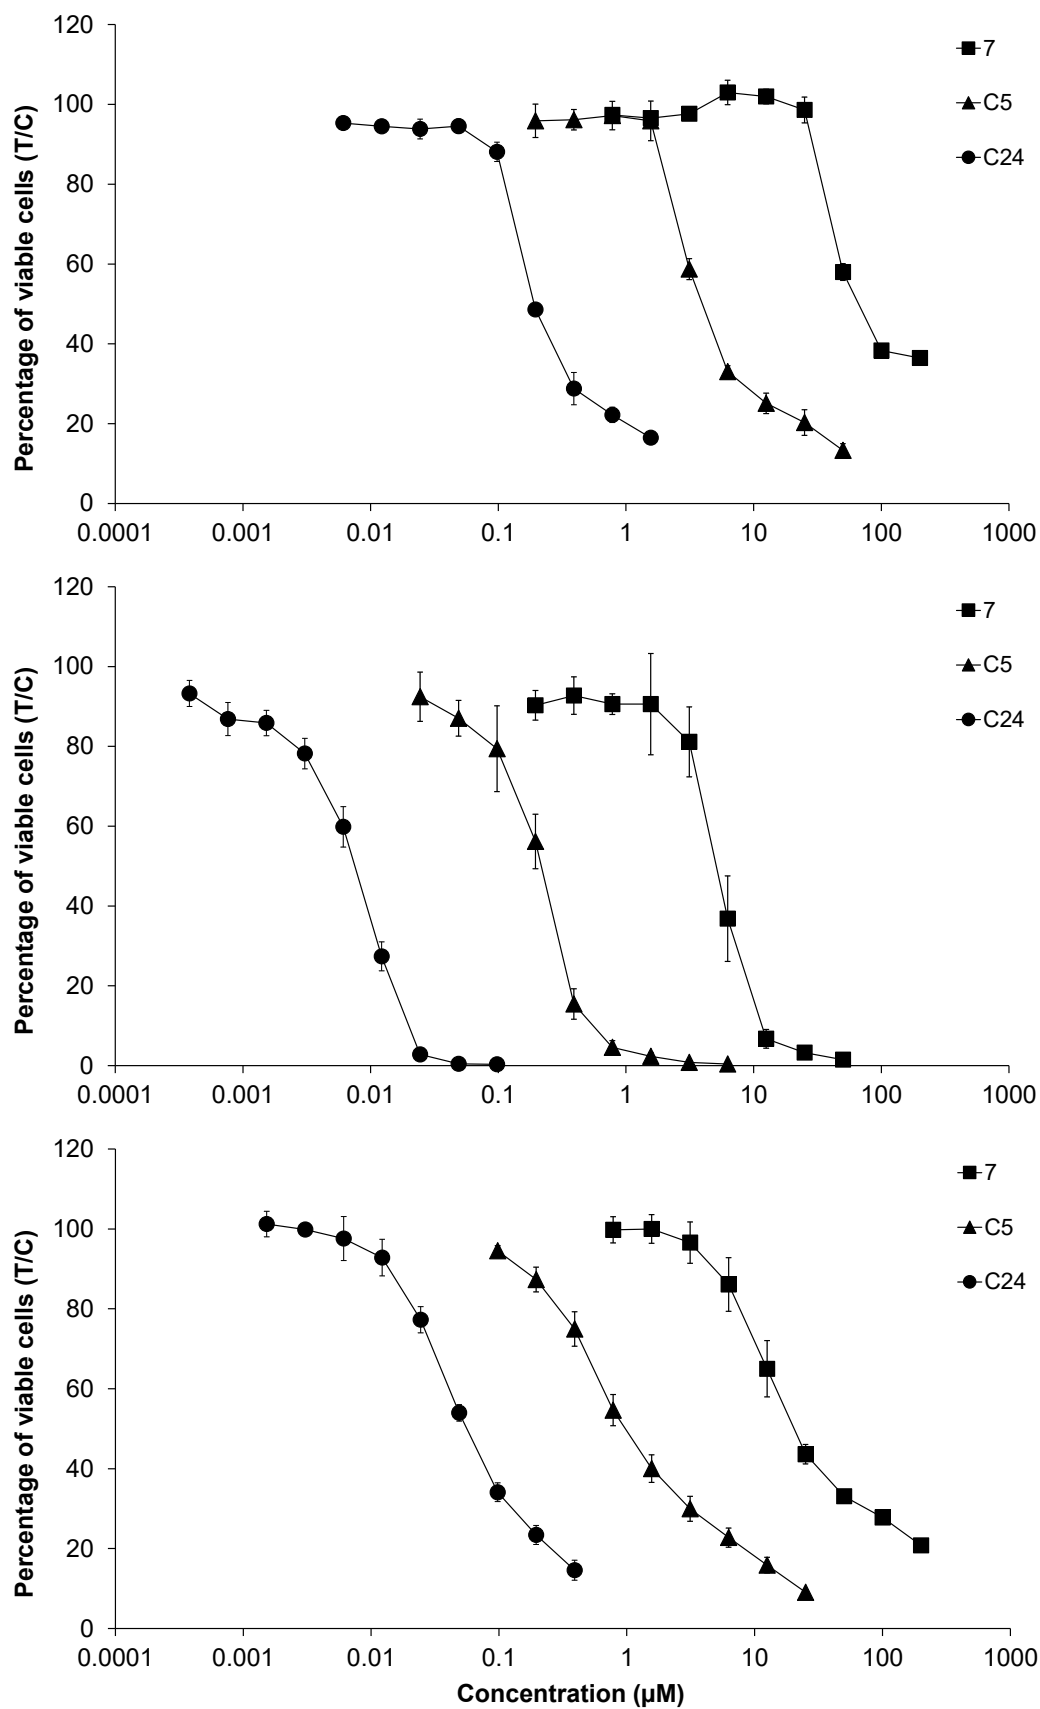

**Figure S27.** Concentration-effect curves of **7**, **C5** and **C24** in A549 (top), CH1/PA-1 (middle) and SW480 (bottom) cells, obtained by MTT assays with 96 h exposure time. Values are means  $\pm$  standard deviations from at least three independent experiments.

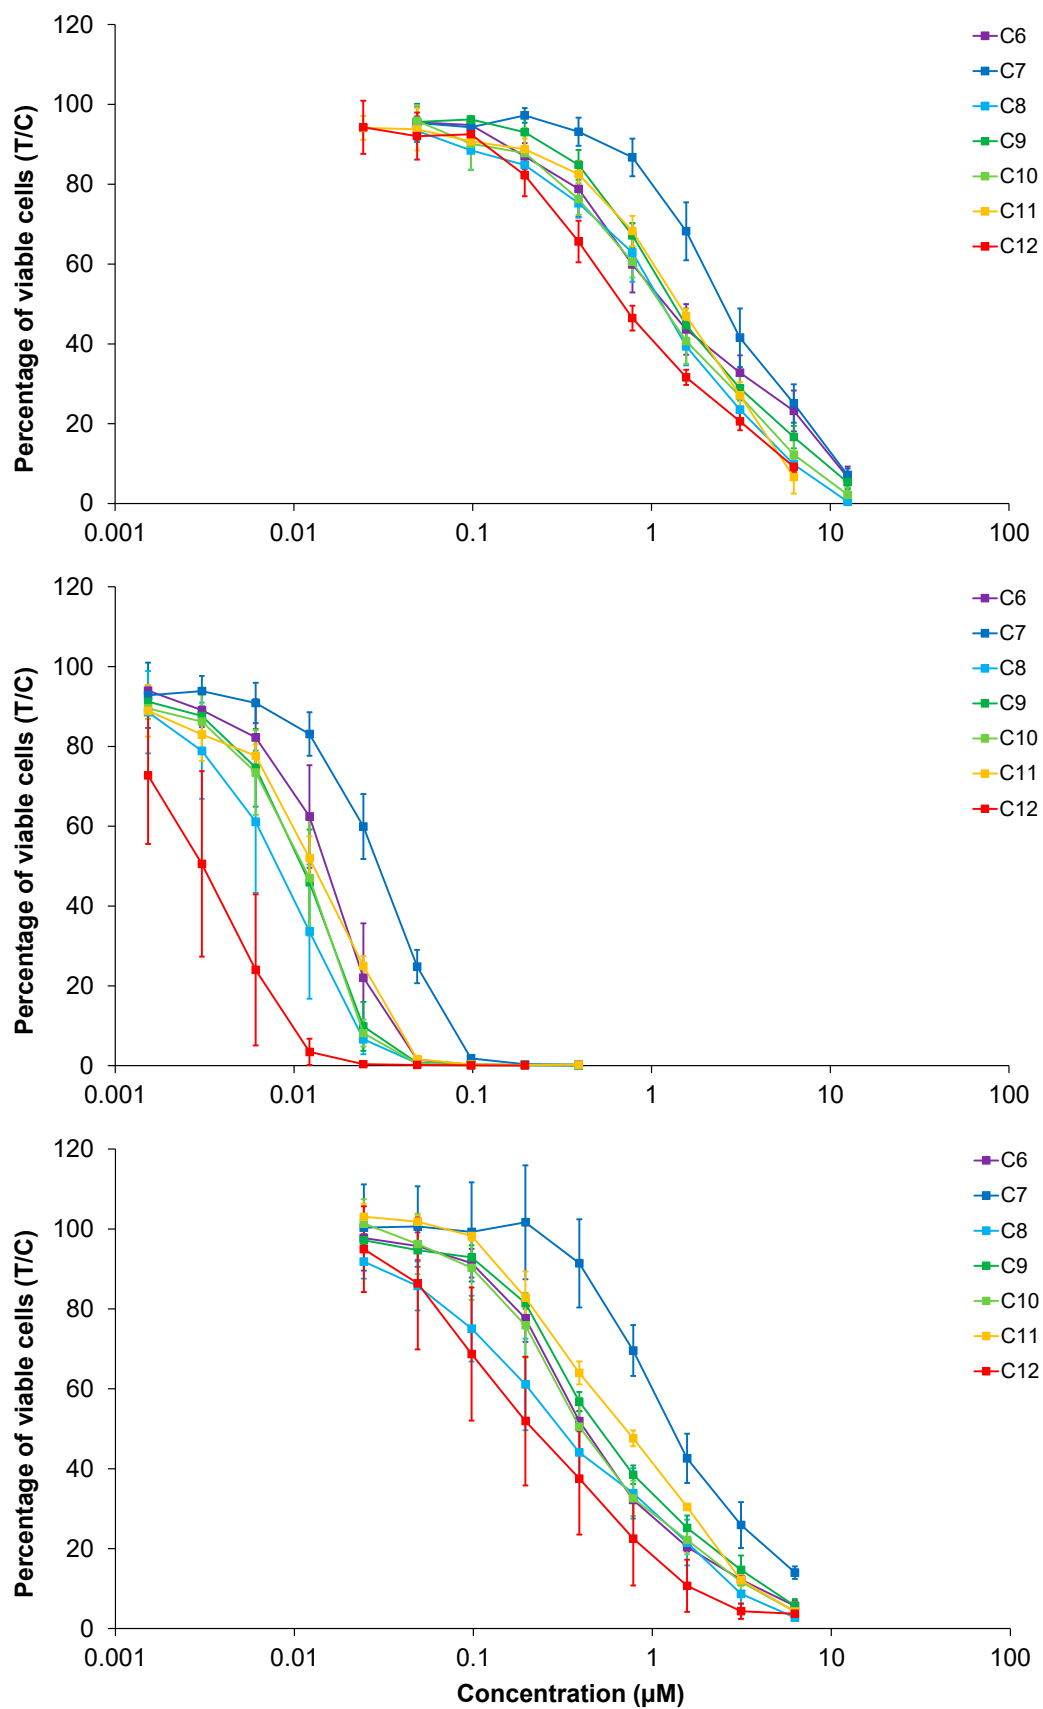

**Figure S28.** Concentration-effect curves of **C6–C12** in A549 (top), CH1/PA-1 (middle) and SW480 (bottom) cells, obtained by MTT assays with 96 h exposure time. Values are means  $\pm$  standard deviations from at least three independent experiments. Compounds are color-coded according to their Pt loading from purple (lowest) to red (highest).



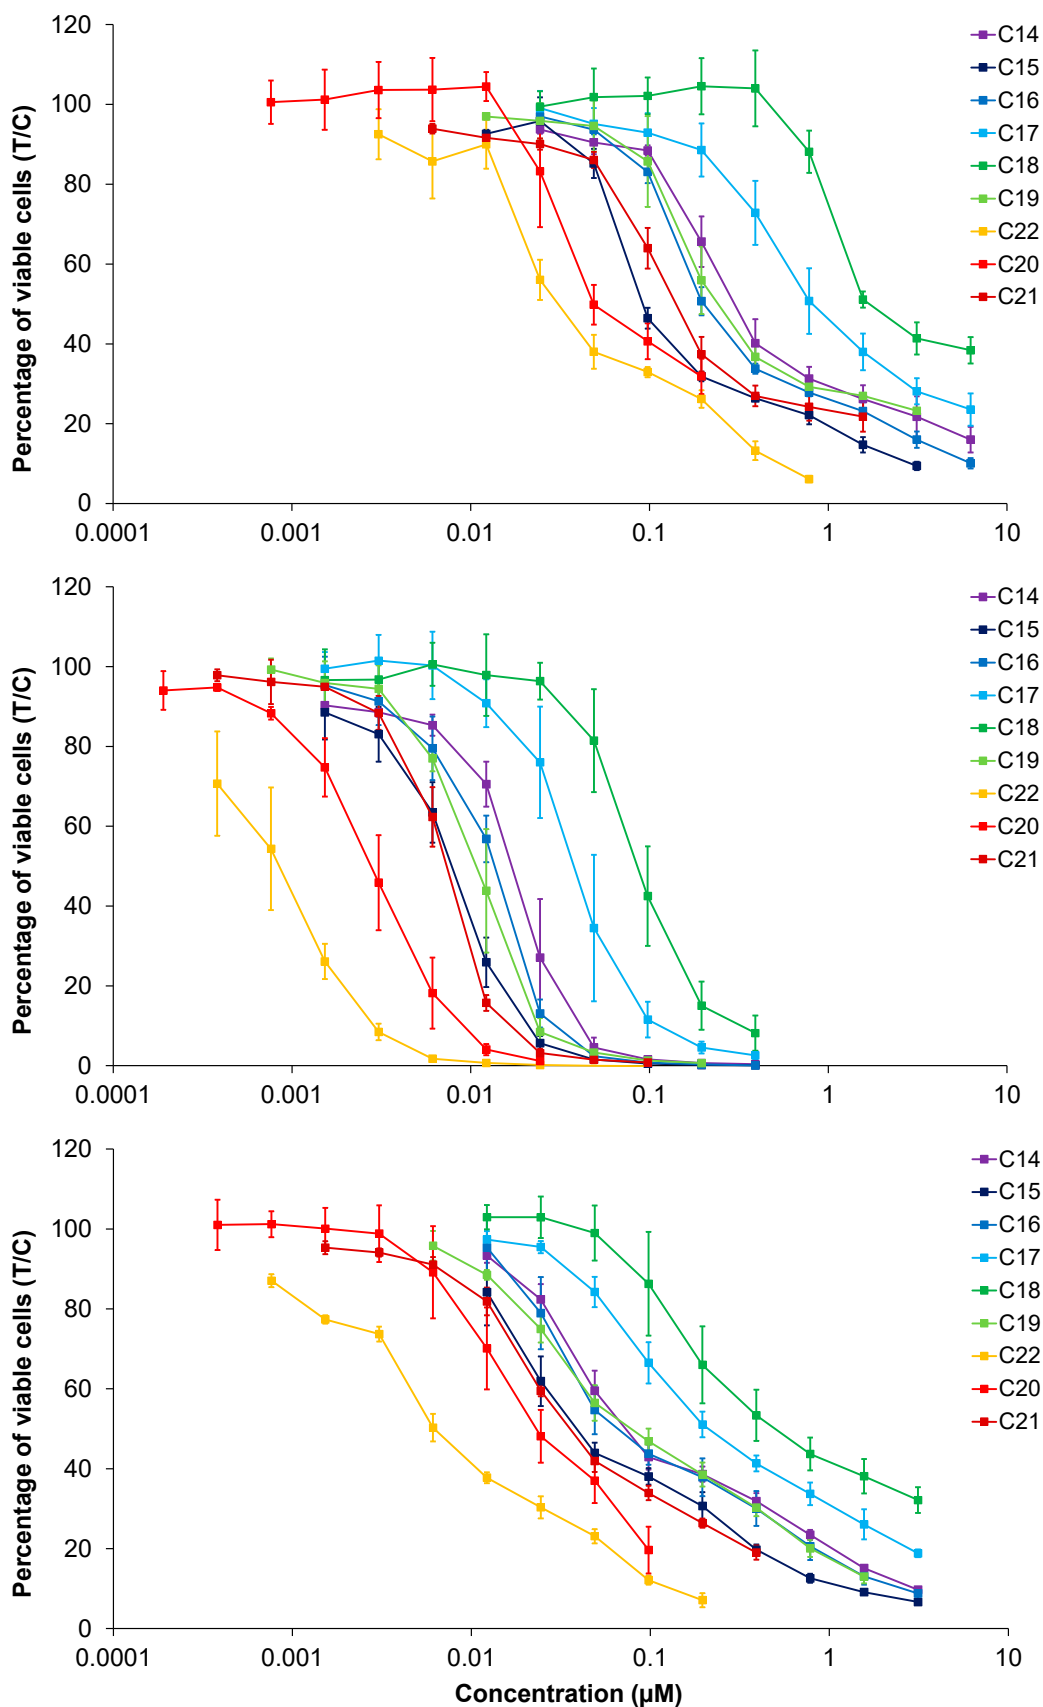

**Figure S29.** Concentration-effect curves of **C14–C21** in A549 (top), CH1/PA-1 (middle) and SW480 (bottom) cells, obtained by MTT assays with 96 h exposure time. Values are means  $\pm$  standard deviations from at least three independent experiments. Compounds are color-coded according to their Pt loading from purple (lowest) to red (highest).

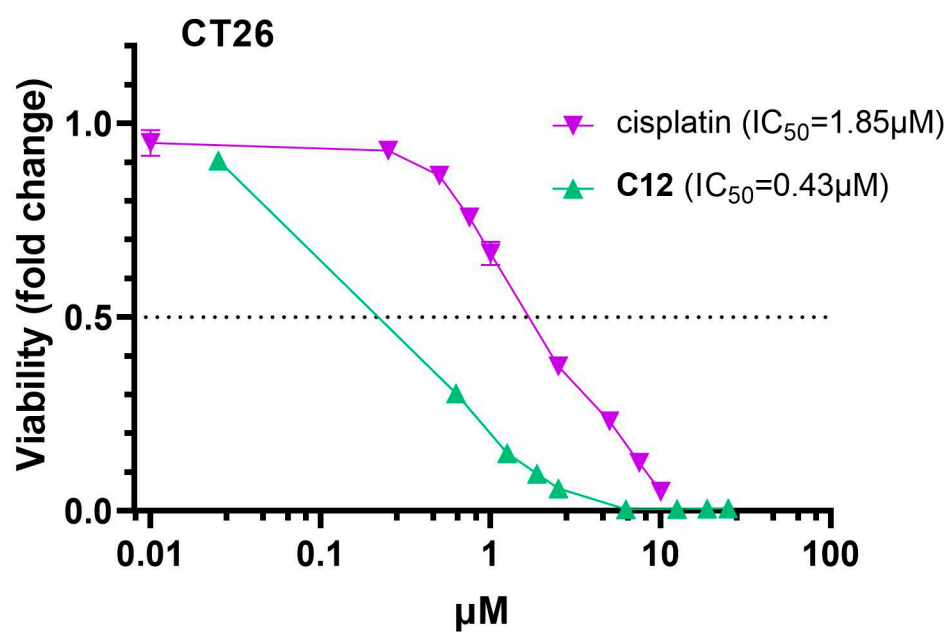

**Figure S30.** Concentration-effect curves of cisplatin and **C12** at the indicated doses (equimolar concerning cisplatin) in CT26 cells, obtained by MTT assays with 72 h exposure time.

## 5. In Vivo Data

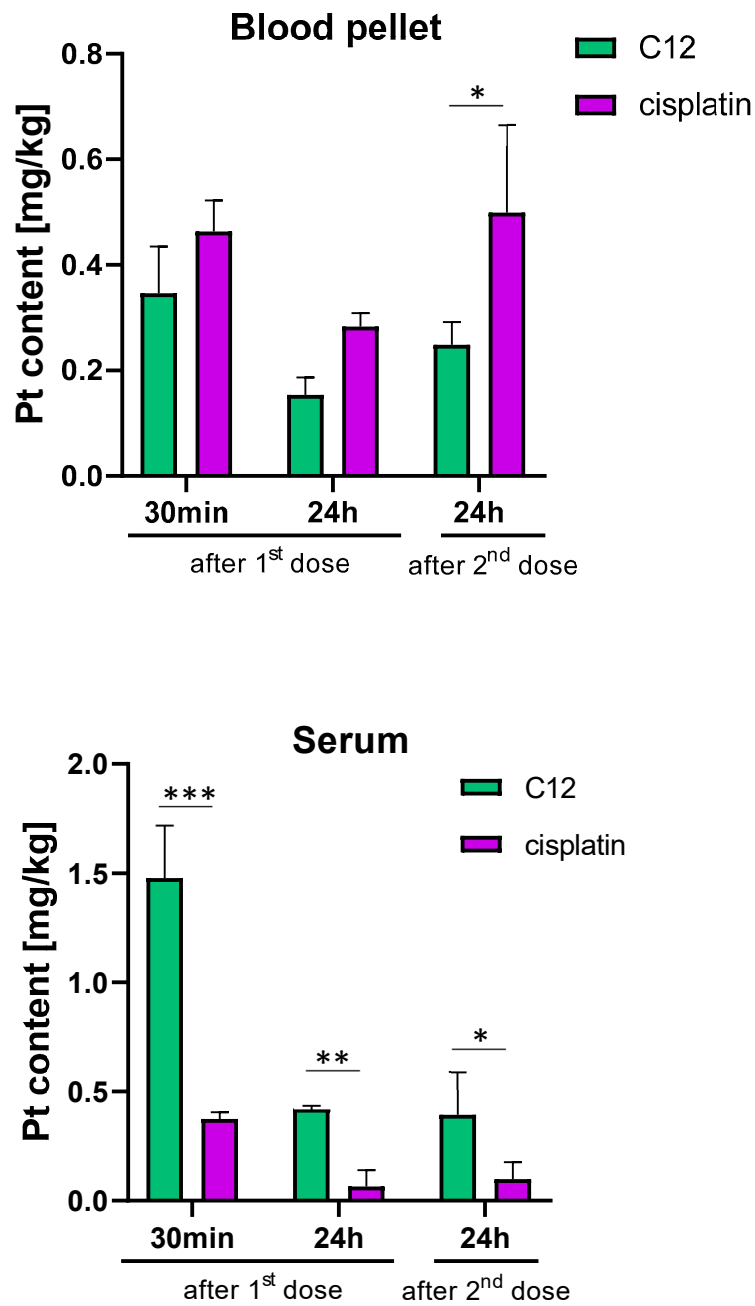

**Figure S31.** Comparison of platinum amount in the blood pellet and serum of conjugate **C12** and cisplatin. Significances were determined via Log-rank test (LRT) and Gehan-Breslow-Wilcoxon test (GBWT) with following abbreviations: ns = not significant, \*  $p < 0.05$ , \*\*  $p < 0.01$ , \*\*\*  $p < 0.001$ , \*\*\*\*  $p < 0.0001$ .

## 6. References

1. Bruker SAINT v8.38B Copyright © 2005-2019 Bruker AXS.
2. Sheldrick, G. M. (1996). SADABS. University of Göttingen, Germany.
3. Dolomanov, O. V.; Bourhis, L.J.; Gildea, R.J.; Howard, J.A.K.; Puschmann, H. OLEX2: A Complete Structure Solution, Refinement and Analysis Program. *J Appl Crystallogr* **2009**, *42*, 339–341, doi:10.1107/S0021889808042726.
4. Hübschle, C.B.; Sheldrick, G.M.; Dittrich, B. ShelXle: A Qt Graphical User Interface for SHELXL. *J Appl Crystallogr* **2011**, *44*, 1281–1284, doi:10.1107/S0021889811043202.
5. Sheldrick, G. M. (2015). SHELXS v 2016/4 University of Göttingen, Germany.
6. Sheldrick, G. M. (2015). SHELXL v 2016/4 University of Göttingen, Germany.
7. Spek, A.L. Structure Validation in Chemical Crystallography. *Acta Crystallogr D Biol Crystallogr* **2009**, *65*, 148–155, doi:10.1107/S090744490804362X.
